# Supplementary material for: Synergistic roles of Synaptotagmin-1 and complexin in calcium-regulated neuronal exocytosis
Source: eLife. 2020 May 13;9:e54506. doi: 10.7554/eLife.54506 (PMC7220375; doi:10.7554/eLife.54506)
Supplement: Source data 1. [file elife-54506-data1.xlsx]

## Sheet: Figure 1
Figure 1A							Figure 1B											Figure 1C
Time (s)	Normalized fluorescence intensity						Time (s)	Survival Percentage											Number of docked vesicle per 5 µm hole
	vSUV	vSUV + Cpx	Syt1-vSUV	Syt1-vSUV + Cpx				v-SUV		vSUV + Cpx		Syt1-vSUV		Syt1-vSUV + Cpx				N	vSUV4X	vSUV4X + Cpx	Syt1-vSUV4X	Syt1-vSUV4X + Cpx
0.147	0.13656	0.10083	0.1538	0.1329				Average	SD	Average	SD	Average	SD	Average	SD			1	0.65333	5.4	1.9	6.8
0.294	0.18053	0.12583	0.14305	0.02302			0	100	0	100	0	100	0	100	0			2	0.7616	5.13	1.76	7.2
0.441	0.13608	0.07661	0.08813	0.06179			0.147	100	0	94.998	7.38	100	0	100	0			3	0.62292	3.2	3.805	7
0.588	0.21879	0.07584	0.06305	0.11222			0.294	98.481	3.397	85.39	12.39	100	0	100	0			4	0.40417	2.7	2.7	5.05
0.735	0.06516	0.12293	0.13968	0.03887			0.441	91.156	6.478	67.139	12.737	99.626	0.49	100	0			5	0.6875	3.6	4.495	6.589
0.882	0.12297	0.14344	0.10951	0.01379			0.588	79.785	9.479	49.452	9.611	99.149	0.883	100	0
1.029	0.12952	0.14115	0.27786	0			0.735	65.437	9.285	39.41	8.73	97.54	1.854	99.892	0.265
1.176	0.12824	0.12226	0.56984	0.2101			0.882	53.691	10.045	29.809	6.797	96.753	1.427	99.892	0.265
1.323	0.19927	0.06281	0.56039	0.10102			1.029	41.348	10.873	22.768	6.115	95.194	0.958	99.892	0.265
1.47	0.66449	0.06006	0.67034	0.20903			1.176	32.973	10.649	17.632	4.91	92.981	1.787	99.892	0.265
1.617	0.72546	0.27024	0.86649	0.04352			1.323	26.59	8.868	11.166	6.385	91.55	1.968	99.804	0.307
1.764	0.66988	0.65367	0.80527	0.01693			1.47	18.551	5.529	9.501	5.29	89.749	1.829	99.804	0.307
1.911	0.81773	0.87137	0.80766	1			1.617	14.946	4.552	8.117	4.662	87.869	1.458	99.804	0.307
2.058	0.22649	0.88786	0.92738	0.80539			1.764	12.228	3.963	6.69	3.983	84.817	1.98	99.804	0.307
2.205	0.11255	1	0.81558	0.83199			1.911	10.797	4.773	6.171	3.666	82.82	2.296	99.627	0.649
2.352	0.10079	0.96351	0.76782	0.66702			2.058	9.414	4.983	5.444	3.008	80.45	2.807	99.627	0.649
2.499	0.11107	0.66523	0.80212	0.80262			2.205	7.917	4.433	5.444	3.008	77.306	2.249	99.539	0.851
2.646	0.13861	0.48886	0.96397	0.6715			2.352	7.626	4.349	4.421	2.132	74.19	3.13	99.539	0.851
2.793	0.08437	0.28199	0.95669	0.7256			2.499	7.16	4.202	4.421	2.132	71.728	2.469	99.363	1.27
2.94	0.13015	0.14115	0.77521	0.78426			2.646	6.753	4.003	4.198	2.046	70.494	2.963	99.363	1.27
3.087	0.14139	0.12226	0.8589	0.82742			2.793	6.402	3.955	3.917	1.612	68.288	2.389	99.363	1.27
3.234	0.13443	0.06281	0.88679	0.78103			2.94	5.833	3.562	3.917	1.612	66.597	2.005	99.363	1.27
3.381	0.11447	0.00265	0.92402	0.82886			3.087	5.833	3.562	3.19	1.204	63.6	2.25	99.363	1.27
3.528	0.0986	0.01471	1	0.91026			3.234	5.657	3.565	3.19	1.204	60.4	4.026	99.363	1.27
3.675	0.11963	0.11269	0.91534	0.76178			3.381	5.657	3.565	2.909	0.888	58.688	4.197	99.274	1.482
3.822	0.09676	0.10557	0.86942	0.78336			3.528	5.657	3.565	2.67	0.665	56.317	4.285	99.274	1.482
3.969	0.09914	0.13463	0.89026	0.68565			3.675	5.425	3.397	2.67	0.665	54.772	4.441	99.274	1.482
4.116	0.09594	0.15006	0.85597	0.72712			3.822	5.425	3.397	2.67	0.665	53.304	4.193	99.166	1.499
4.263	0.10998	0.07111	0.72832	0.68709			3.969	4.91	2.858	2.67	0.665	52.814	3.817	99.166	1.499
4.41	0.07993	0.06179	0.71508	0.7436			4.116	4.91	2.858	2.67	0.665	51.102	4.4	99.166	1.499
4.557	0.10394	0.06123	0.84783	0.75264			4.263	4.91	2.858	2.67	0.665	48.464	4.681	99.166	1.499
4.704	0.08728	0.07437	0.84359	0.74485			4.41	4.91	2.858	2.432	0.742	47.483	3.978	99.166	1.499
4.851	0.093	0.07182	0.75805	0.84238			4.557	4.91	2.858	2.432	0.742	46.05	3.471	99.166	1.499
4.998	0.08207	0.051	0.75805	0.64849			4.704	4.91	2.858	2.432	0.742	44.854	4.006	99.058	1.561
5.145	0.07352	0.05487	0.75208	0.71727			4.851	4.91	2.858	2.432	0.742	43.163	4.444	99.058	1.561
5.292	0.084	0.00845	0.80658	0.77521			4.998	4.91	2.858	2.432	0.742	40.757	4.757	99.058	1.561
5.439	0.08398	0	0.92294	0.71861			5.145	4.91	2.858	2.432	0.742	39.84	4.384	98.882	1.948
5.586	0.10061	0.00596	0.78649	0.63308			5.292	4.91	2.858	2.432	0.742	39.169	5.071	98.617	2.555
5.733	0.08704	0.00331	0.54368	0.89432			5.439	4.396	2.441	2.432	0.742	38.434	5.316	98.617	2.555
5.88	0.09258	0.01573	0.36339	0.73482			5.586	4.396	2.441	2.432	0.742	37.25	4.965	98.529	2.761
6.027	0.09188	0.01736	0.15282	0.67383			5.733	4.396	2.441	2.432	0.742	35.321	5.002	98.529	2.761
6.174	0.09723	0.07208	0.04058	0.67114			5.88	4.396	2.441	2.432	0.742	33.869	5.31	98.529	2.761
6.321	0.11176	0.10959	0.08182	0.69219			6.027	4.396	2.441	2.432	0.742	32.788	5.064	98.421	2.796
6.468	0.08601	0.10949	0.09734	0.68207			6.174	4.396	2.441	2.432	0.742	31.834	5.104	98.421	2.796
6.615	0.10836	0.02479	0.08052	0.67607			6.321	4.396	2.441	2.152	0.404	29.97	4.916	98.421	2.796
6.762	0.07719	0.01359	0.06316	0.69819			6.468	4.396	2.441	2.152	0.404	28.363	5.543	98.421	2.796
6.909	0.08337	0.09325	0.06968	0.72309			6.615	4.396	2.441	2.152	0.404	27.499	4.593	98.421	2.796
7.056	0.08709	0.07691	0.12688	0.55293			6.762	4.396	2.441	2.152	0.404	27.06	4.927	98.421	2.796
7.203	0.09519	0.04169	0.12776	0.77378			6.909	4.396	2.441	2.152	0.404	26.711	4.529	98.421	2.796
7.35	0.10125	0.12394	0.1081	0.83083			7.056	4.396	2.441	2.152	0.404	25.501	4.875	98.421	2.796
7.497	0.11207	0.15662	0.02474	0.7341			7.203	4.396	2.441	2.152	0.404	24.933	4.72	98.421	2.796
7.644	0.10155	0.08582	0	0.76258			7.35	4.396	2.441	2.152	0.404	24.817	4.627	98.421	2.796
7.791	0.09693	0.07788	0.06328	0.5678			7.497	4.396	2.441	2.152	0.404	24.817	4.627	98.421	2.796
7.938	0.10677	0.10949	0.07695	0.7144			7.644	4.396	2.441	2.152	0.404	23.927	5.137	98.421	2.796
8.085	0.10505	0.1157	0.01725	0.6527			7.791	4.396	2.441	2.152	0.404	23.053	5.24	98.421	2.796
8.232	0.08909	0.21129	0.0026	0.63828			7.938	4.396	2.441	2.152	0.404	22.679	4.773	98.421	2.796
8.379	0.05561	0.21628	0.04167	0.80799			8.085	4.396	2.441	2.152	0.404	22.305	4.31	98.421	2.796
8.526	0.11383	0.11478	0.06295	0.87337			8.232	4.396	2.441	2.152	0.404	22.305	4.31	98.421	2.796
8.673	0.10251	0.09452	0.13232	0.76643			8.379	4.396	2.441	2.152	0.404	22.305	4.31	98.333	2.998
8.82	0.112	0.09325	0.10539	0.71315			8.526	4.396	2.441	2.152	0.404	22.188	4.214	98.333	2.998
8.967	0.08226	0.19261	0.09128	0.63156			8.673	4.396	2.441	2.152	0.404	21.853	4.343	98.333	2.998
9.114	0.10143	0.19607	0.09486	0.62878			8.82	4.396	2.441	2.152	0.404	21.853	4.343	98.333	2.998
9.261	0.09636	0.08882	0.04732	0.62735			8.967	4.057	2.124	2.152	0.404	20.643	4.63	98.333	2.998
9.408	0.10375	0.09391	0.02691	0.67849			9.114	4.057	2.124	2.152	0.404	20.269	4.164	98.333	2.998
9.555	0.07412	0.16131	0.04514	0.82715			9.261	3.882	2.215	2.152	0.404	20.05	4.373	98.333	2.998
9.702	0.09378	0.11773	0.08531	0.66219			9.408	3.882	2.215	2.152	0.404	19.934	4.281	98.333	2.998
9.849	0.12187	0.05976	0.10659	0.65592			9.555	3.882	2.215	2.152	0.404	19.934	4.281	98.333	2.998
9.996	0.11015	0.06617	0.1538	0.69067			9.702	3.882	2.215	2.152	0.404	19.598	4.436	98.333	2.998
10.143	0.09626	0.30077	0.14305	0.61517			9.849	3.882	2.215	2.152	0.404	19.146	4.558	98.244	3.201
							9.996	3.882	2.215	2.152	0.404	19.03	4.503	98.244	3.201
							10.143	3.882	2.215	2.152	0.404	18.53	5.031	98.136	3.246
							10.29	3.882	2.215	2.152	0.404	18.53	5.031	98.136	3.246
							10.437	3.882	2.215	2.152	0.404	18.156	4.548	98.136	3.246
							10.584	3.882	2.215	2.152	0.404	17.64	3.757	98.028	3.312
							10.731	3.882	2.215	2.152	0.404	17.421	3.987	98.028	3.312
							10.878	3.882	2.215	2.152	0.404	17.421	3.987	98.028	3.312
							11.025	3.882	2.215	2.152	0.404	17.421	3.987	98.028	3.312
							11.172	3.882	2.215	2.152	0.404	17.421	3.987	98.028	3.312
							11.319	3.882	2.215	2.152	0.404	17.421	3.987	97.94	3.504
							11.466	3.882	2.215	2.152	0.404	17.421	3.987	97.94	3.504
							11.613	3.882	2.215	2.152	0.404	17.421	3.987	97.94	3.504
							11.76	3.882	2.215	2.152	0.404	17.421	3.987	97.94	3.504
							11.907	3.882	2.215	2.152	0.404	17.305	3.893	97.94	3.504
							12.054	3.882	2.215	2.152	0.404	17.305	3.893	97.94	3.504
							12.201	3.882	2.215	2.152	0.404	17.189	3.81	97.94	3.504
							12.348	3.882	2.215	2.152	0.404	16.969	4.069	97.94	3.504
							12.495	3.882	2.215	2.152	0.404	16.634	4.279	97.94	3.504
							12.642	3.882	2.215	2.152	0.404	16.634	4.279	97.94	3.504
							12.789	3.882	2.215	2.152	0.404	16.634	4.279	97.94	3.504
							12.936	3.882	2.215	2.152	0.404	16.634	4.279	97.94	3.504
							13.083	3.882	2.215	2.152	0.404	16.634	4.279	97.94	3.504
							13.23	3.882	2.215	2.152	0.404	16.634	4.279	97.94	3.504
							13.377	3.882	2.215	2.152	0.404	16.518	4.213	97.94	3.504
							13.524	3.882	2.215	2.152	0.404	16.401	4.16	97.94	3.504
							13.671	3.882	2.215	2.152	0.404	16.401	4.16	97.94	3.504
							13.818	3.882	2.215	2.152	0.404	16.401	4.16	97.94	3.504
							13.965	3.882	2.215	2.152	0.404	16.182	4.461	97.94	3.504
							14.112	3.882	2.215	2.152	0.404	16.182	4.461	97.94	3.504
							14.259	3.882	2.215	2.152	0.404	16.182	4.461	97.94	3.504
							14.406	3.882	2.215	2.152	0.404	16.182	4.461	97.94	3.504
							14.553	3.882	2.215	2.152	0.404	16.182	4.461	97.94	3.504
							14.7	3.882	2.215	2.152	0.404	16.182	4.461	97.94	3.504
							14.847	3.882	2.215	2.152	0.404	15.743	5.125	97.94	3.504
							14.994	3.882	2.215	2.152	0.404	15.743	5.125	97.94	3.504
							15.141	3.882	2.215	2.152	0.404	15.743	5.125	97.94	3.504
							15.288	3.882	2.215	2.152	0.404	15.743	5.125	97.94	3.504
							15.435	3.882	2.215	2.152	0.404	15.743	5.125	97.94	3.504
							15.582	3.882	2.215	2.152	0.404	15.743	5.125	97.94	3.504
							15.729	3.882	2.215	2.152	0.404	15.743	5.125	97.94	3.504
							15.876	3.882	2.215	2.152	0.404	15.743	5.125	97.94	3.504
							16.023	3.882	2.215	2.152	0.404	15.743	5.125	97.94	3.504
							16.17	3.882	2.215	2.152	0.404	15.743	5.125	97.94	3.504
							16.317	3.882	2.215	2.152	0.404	15.743	5.125	97.94	3.504
							16.464	3.882	2.215	2.152	0.404	15.743	5.125	97.94	3.504
							16.611	3.882	2.215	2.152	0.404	15.743	5.125	97.94	3.504
							16.758	3.882	2.215	2.152	0.404	15.743	5.125	97.832	3.581
							16.905	3.882	2.215	2.152	0.404	15.743	5.125	97.832	3.581
							17.052	3.882	2.215	2.152	0.404	15.743	5.125	97.832	3.581
							17.199	3.882	2.215	2.152	0.404	15.743	5.125	97.832	3.581
							17.346	3.882	2.215	2.152	0.404	15.743	5.125	97.832	3.581
							17.493	3.882	2.215	2.152	0.404	15.743	5.125	97.832	3.581
							17.64	3.882	2.215	2.152	0.404	15.266	5.106	97.832	3.581
							17.787	3.882	2.215	2.152	0.404	15.266	5.106	97.723	3.676
							17.934	3.882	2.215	2.152	0.404	15.266	5.106	97.723	3.676
							18.081	3.882	2.215	2.152	0.404	15.266	5.106	97.723	3.676
							18.228	3.882	2.215	2.152	0.404	15.266	5.106	97.723	3.676
							18.375	3.882	2.215	2.152	0.404	15.266	5.106	97.723	3.676
							18.522	3.882	2.215	2.152	0.404	15.266	5.106	97.723	3.676
							18.669	3.882	2.215	2.152	0.404	15.266	5.106	97.723	3.676
							18.816	3.882	2.215	2.152	0.404	15.266	5.106	97.723	3.676
							18.963	3.882	2.215	2.152	0.404	15.266	5.106	97.723	3.676
							19.11	3.882	2.215	2.152	0.404	15.266	5.106	96.822	3.013
							19.257	3.882	2.215	2.152	0.404	15.266	5.106	96.822	3.013
							19.404	3.882	2.215	2.152	0.404	15.047	5.483	96.822	3.013
							19.551	3.882	2.215	2.152	0.404	15.047	5.483	96.822	3.013
							19.698	3.882	2.215	2.152	0.404	15.047	5.483	96.822	3.013
							19.845	3.882	2.215	2.152	0.404	15.047	5.483	96.822	3.013
							19.992	3.882	2.215	2.152	0.404	15.047	5.483	96.822	3.013
							20.139	3.882	2.215	2.152	0.404	15.047	5.483	96.822	3.013
							20.286	3.882	2.215	2.152	0.404	15.047	5.483	96.822	3.013
							20.433	3.882	2.215	2.152	0.404	15.047	5.483	96.822	3.013
							20.58	3.882	2.215	2.152	0.404	15.047	5.483	96.822	3.013
							20.727	3.882	2.215	2.152	0.404	15.047	5.483	96.822	3.013
							20.874	3.882	2.215	2.152	0.404	15.047	5.483	96.822	3.013
							21.021	3.882	2.215	2.152	0.404	15.047	5.483	96.822	3.013
							21.168	3.882	2.215	2.152	0.404	15.047	5.483	96.822	3.013
							21.315	3.882	2.215	2.152	0.404	15.047	5.483	96.822	3.013
							21.462	3.882	2.215	2.152	0.404	15.047	5.483	96.822	3.013
							21.609	3.882	2.215	2.152	0.404	15.047	5.483	96.822	3.013
							21.756	3.882	2.215	2.152	0.404	15.047	5.483	96.822	3.013
							21.903	3.882	2.215	2.152	0.404	15.047	5.483	96.822	3.013
							22.05	3.882	2.215	2.152	0.404	15.047	5.483	96.822	3.013
							22.197	3.882	2.215	2.152	0.404	15.047	5.483	96.822	3.013
							22.344	3.882	2.215	2.152	0.404	15.047	5.483	96.822	3.013
							22.491	3.882	2.215	2.152	0.404	15.047	5.483	96.822	3.013
							22.638	3.882	2.215	2.152	0.404	15.047	5.483	96.822	3.013
							22.785	3.882	2.215	2.152	0.404	14.828	5.868	96.822	3.013
							22.932	3.882	2.215	2.152	0.404	14.828	5.868	96.822	3.013
							23.079	3.882	2.215	2.152	0.404	14.828	5.868	96.822	3.013
							23.226	3.882	2.215	2.152	0.404	14.828	5.868	96.822	3.013
							23.373	3.882	2.215	2.152	0.404	14.828	5.868	96.822	3.013
							23.52	3.882	2.215	2.152	0.404	14.711	5.797	96.822	3.013
							23.667	3.882	2.215	2.152	0.404	14.711	5.797	96.822	3.013
							23.814	3.882	2.215	2.152	0.404	14.711	5.797	96.822	3.013
							23.961	3.882	2.215	2.152	0.404	14.711	5.797	96.822	3.013
							24.108	3.882	2.215	2.152	0.404	14.711	5.797	96.822	3.013
							24.255	3.882	2.215	2.152	0.404	14.711	5.797	96.822	3.013
							24.402	3.882	2.215	2.152	0.404	14.711	5.797	96.822	3.013
							24.549	3.882	2.215	2.152	0.404	14.711	5.797	96.822	3.013
							24.696	3.882	2.215	2.152	0.404	14.711	5.797	96.822	3.013
							24.843	3.882	2.215	2.152	0.404	14.711	5.797	96.822	3.013
							24.99	3.882	2.215	2.152	0.404	14.492	6.189	96.822	3.013
							25.137	3.882	2.215	2.152	0.404	14.492	6.189	96.822	3.013
							25.284	3.882	2.215	2.152	0.404	14.492	6.189	96.822	3.013
							25.431	3.882	2.215	2.152	0.404	14.492	6.189	96.822	3.013
							25.578	3.882	2.215	2.152	0.404	14.492	6.189	96.822	3.013
							25.725	3.882	2.215	2.152	0.404	14.492	6.189	96.822	3.013
							25.872	3.882	2.215	2.152	0.404	14.492	6.189	96.822	3.013
							Number of independent experiments = 4-5
							Number of vesicle measured: 500 - 1000 per conditon

## Sheet: Figure 1 -figure supplement
Figure 1 - figure supplement 3A						Figure 1 - figure supplement 3B
	Survival Percentage						Survival Percentage
Time (s)	Average	SD				Time (s)	Average	SD
0	100	0				0	100	0
0.147	100	0				60	96.6459	3.39118
0.294	100	0				300	96.6459	3.39118
0.441	100	0				600	97.9167	2.94628
0.588	100	0				1200	95.2083	2.06239
0.735	99.8918	0.26495				1500	93.0556	1.96419
0.882	99.8918	0.26495				1800	92.0139	3.43732
1.029	99.8918	0.26495				2700	87.2222	4.12
1.176	99.8918	0.26495
1.323	99.8037	0.30652				Number of independent experiments = 3
1.47	99.8037	0.30652				Number of vesicle measured: ~150
1.617	99.8037	0.30652
1.764	99.8037	0.30652
1.911	99.6273	0.64907
2.058	99.6273	0.64907
2.205	99.5392	0.85141
2.352	99.5392	0.85141
2.499	99.3627	1.27001
2.646	99.3627	1.27001
2.793	99.3627	1.27001
2.94	99.3627	1.27001
3.087	99.3627	1.27001
3.234	99.3627	1.27001
3.381	99.2745	1.48207
3.528	99.2745	1.48207
3.675	99.2745	1.48207
3.822	99.1662	1.49902
3.969	99.1662	1.49902
4.116	99.1662	1.49902
4.263	99.1662	1.49902
4.41	99.1662	1.49902
4.557	99.1662	1.49902
4.704	99.058	1.56142
4.851	99.058	1.56142
4.998	99.058	1.56142
5.145	98.8817	1.94768
5.292	98.6172	2.55465
5.439	98.6172	2.55465
5.586	98.529	2.76111
5.733	98.529	2.76111
5.88	98.529	2.76111
6.027	98.4208	2.79602
6.174	98.4208	2.79602
6.321	98.4208	2.79602
6.468	98.4208	2.79602
6.615	98.4208	2.79602
6.762	98.4208	2.79602
6.909	98.4208	2.79602
7.056	98.4208	2.79602
7.203	98.4208	2.79602
7.35	98.4208	2.79602
7.497	98.4208	2.79602
7.644	98.4208	2.79602
7.791	98.4208	2.79602
7.938	98.4208	2.79602
8.085	98.4208	2.79602
8.232	98.4208	2.79602
8.379	98.3327	2.9976
8.526	98.3327	2.9976
8.673	98.3327	2.9976
8.82	98.3327	2.9976
8.967	98.3327	2.9976
9.114	98.3327	2.9976
9.261	98.3327	2.9976
9.408	98.3327	2.9976
9.555	98.3327	2.9976
9.702	98.3327	2.9976
9.849	98.2443	3.20144
9.996	98.2443	3.20144
10.143	98.136	3.24629
10.29	98.136	3.24629
10.437	98.136	3.24629
10.584	98.0278	3.31174
10.731	98.0278	3.31174
10.878	98.0278	3.31174
11.025	98.0278	3.31174
11.172	98.0278	3.31174
11.319	97.9397	3.50377
11.466	97.9397	3.50377
11.613	97.9397	3.50377
11.76	97.9397	3.50377
11.907	97.9397	3.50377
12.054	97.9397	3.50377
12.201	97.9397	3.50377
12.348	97.9397	3.50377
12.495	97.9397	3.50377
12.642	97.9397	3.50377
12.789	97.9397	3.50377
12.936	97.9397	3.50377
13.083	97.9397	3.50377
13.23	97.9397	3.50377
13.377	97.9397	3.50377
13.524	97.9397	3.50377
13.671	97.9397	3.50377
13.818	97.9397	3.50377
13.965	97.9397	3.50377
14.112	97.9397	3.50377
14.259	97.9397	3.50377
14.406	97.9397	3.50377
14.553	97.9397	3.50377
14.7	97.9397	3.50377
14.847	97.9397	3.50377
14.994	97.9397	3.50377
15.141	97.9397	3.50377
15.288	97.9397	3.50377
15.435	97.9397	3.50377
15.582	97.9397	3.50377
15.729	97.9397	3.50377
15.876	97.9397	3.50377
16.023	97.9397	3.50377
16.17	97.9397	3.50377
16.317	97.9397	3.50377
16.464	97.9397	3.50377
16.611	97.9397	3.50377
16.758	97.8315	3.58094
16.905	97.8315	3.58094
17.052	97.8315	3.58094
17.199	97.8315	3.58094
17.346	97.8315	3.58094
17.493	97.8315	3.58094
17.64	97.8315	3.58094
17.787	97.7232	3.6758
17.934	97.7232	3.6758
18.081	97.7232	3.6758
18.228	97.7232	3.6758
18.375	97.7232	3.6758
18.522	97.7232	3.6758
18.669	97.7232	3.6758
18.816	97.7232	3.6758
18.963	97.7232	3.6758
19.11	96.8223	3.01257
19.257	96.8223	3.01257
19.404	96.8223	3.01257
19.551	96.8223	3.01257
19.698	96.8223	3.01257
19.845	96.8223	3.01257
19.992	96.8223	3.01257
20.139	96.8223	3.01257
20.286	96.8223	3.01257
20.433	96.8223	3.01257
20.58	96.8223	3.01257
20.727	96.8223	3.01257
20.874	96.8223	3.01257
21.021	96.8223	3.01257
21.168	96.8223	3.01257
21.315	96.8223	3.01257
21.462	96.8223	3.01257
21.609	96.8223	3.01257
21.756	96.8223	3.01257
21.903	96.8223	3.01257
22.05	96.8223	3.01257
22.197	96.8223	3.01257
22.344	96.8223	3.01257
22.491	96.8223	3.01257
22.638	96.8223	3.01257
22.785	96.8223	3.01257
22.932	96.8223	3.01257
23.079	96.8223	3.01257
23.226	96.8223	3.01257
23.373	96.8223	3.01257
23.52	96.8223	3.01257
23.667	96.8223	3.01257
23.814	96.8223	3.01257
23.961	96.8223	3.01257
24.108	96.8223	3.01257
24.255	96.8223	3.01257
24.402	96.8223	3.01257
24.549	96.8223	3.01257
24.696	96.8223	3.01257
24.843	96.8223	3.01257
24.99	96.8223	3.01257
25.137	96.8223	3.01257
25.284	96.8223	3.01257
25.431	96.8223	3.01257
25.578	96.8223	3.01257
25.725	96.8223	3.01257
25.872	96.8223	3.01257
26.019	96.8223	3.01257
26.166	96.8223	3.01257
26.313	96.8223	3.01257
26.46	96.8223	3.01257
26.607	96.8223	3.01257
26.754	96.8223	3.01257
26.901	96.8223	3.01257
27.048	96.8223	3.01257
27.195	96.8223	3.01257
27.342	96.8223	3.01257
27.489	96.8223	3.01257
27.636	96.8223	3.01257
27.783	96.8223	3.01257
27.93	96.8223	3.01257
28.077	96.8223	3.01257
28.224	96.8223	3.01257
28.371	96.8223	3.01257
28.518	96.8223	3.01257
28.665	96.8223	3.01257
28.812	96.8223	3.01257
28.959	96.8223	3.01257
29.106	96.8223	3.01257
29.253	96.8223	3.01257
29.4	96.8223	3.01257
29.547	96.8223	3.01257
29.694	96.8223	3.01257
29.841	96.8223	3.01257
29.988	96.8223	3.01257
30.135	96.8223	3.01257
30.282	96.8223	3.01257
30.429	96.8223	3.01257
30.576	96.8223	3.01257
30.723	96.8223	3.01257
30.87	96.8223	3.01257
31.017	96.8223	3.01257
31.164	96.8223	3.01257
31.311	96.8223	3.01257
31.458	96.8223	3.01257
31.605	96.8223	3.01257
31.752	96.8223	3.01257
31.899	96.8223	3.01257
32.046	96.8223	3.01257
32.193	96.8223	3.01257
32.34	96.8223	3.01257
32.487	96.8223	3.01257
32.634	96.8223	3.01257
32.781	96.8223	3.01257
32.928	96.8223	3.01257
33.075	96.8223	3.01257
33.222	96.8223	3.01257
33.369	96.8223	3.01257
33.516	96.8223	3.01257
33.663	96.8223	3.01257
33.81	96.8223	3.01257
33.957	96.8223	3.01257
34.104	96.8223	3.01257
34.251	96.8223	3.01257
34.398	96.8223	3.01257
34.545	96.8223	3.01257
34.692	96.8223	3.01257
34.839	96.8223	3.01257
34.986	96.8223	3.01257
35.133	96.8223	3.01257
35.28	96.8223	3.01257
35.427	96.8223	3.01257
35.574	96.8223	3.01257
35.721	96.8223	3.01257
35.868	96.8223	3.01257
36.015	96.8223	3.01257
36.162	96.8223	3.01257
36.309	96.8223	3.01257
36.456	96.8223	3.01257
36.603	96.8223	3.01257
36.75	96.8223	3.01257
36.897	96.8223	3.01257
37.044	96.8223	3.01257
37.191	96.8223	3.01257
37.338	96.8223	3.01257
37.485	96.8223	3.01257
37.632	96.8223	3.01257
37.779	96.8223	3.01257
37.926	96.8223	3.01257
38.073	96.8223	3.01257
38.22	96.8223	3.01257
38.367	96.8223	3.01257
38.514	96.8223	3.01257
38.661	96.8223	3.01257
38.808	96.8223	3.01257
38.955	96.8223	3.01257
39.102	96.8223	3.01257
39.249	96.8223	3.01257
39.396	96.8223	3.01257
39.543	96.8223	3.01257
39.69	96.8223	3.01257
39.837	96.8223	3.01257
39.984	96.8223	3.01257
40.131	96.8223	3.01257
40.278	96.8223	3.01257
40.425	96.8223	3.01257
40.572	96.8223	3.01257
40.719	96.8223	3.01257
40.866	96.8223	3.01257
41.013	96.8223	3.01257
41.16	96.8223	3.01257
41.307	96.8223	3.01257
41.454	96.8223	3.01257
41.601	96.8223	3.01257
41.748	96.8223	3.01257
41.895	96.8223	3.01257
42.042	96.8223	3.01257
42.189	96.8223	3.01257
42.336	96.8223	3.01257
42.483	96.8223	3.01257
42.63	96.8223	3.01257
42.777	96.8223	3.01257
42.924	96.8223	3.01257
43.071	96.8223	3.01257
43.218	96.8223	3.01257
43.365	96.8223	3.01257
43.512	96.8223	3.01257
43.659	96.8223	3.01257
43.806	96.8223	3.01257
43.953	96.8223	3.01257
44.1	96.8223	3.01257
44.247	96.8223	3.01257
44.394	96.8223	3.01257
44.541	96.8223	3.01257
44.688	96.8223	3.01257
44.835	96.8223	3.01257
44.982	96.8223	3.01257
45.129	96.8223	3.01257
45.276	96.8223	3.01257
45.423	96.8223	3.01257
45.57	96.8223	3.01257
45.717	96.8223	3.01257
45.864	96.8223	3.01257
46.011	96.8223	3.01257
46.158	96.8223	3.01257
46.305	96.8223	3.01257
46.452	96.8223	3.01257
46.599	96.8223	3.01257
46.746	96.8223	3.01257
46.893	96.8223	3.01257
47.04	96.8223	3.01257
47.187	96.8223	3.01257
47.334	96.8223	3.01257
47.481	96.8223	3.01257
47.628	96.8223	3.01257
47.775	96.8223	3.01257
47.922	96.8223	3.01257
48.069	96.8223	3.01257
48.216	96.8223	3.01257
48.363	96.8223	3.01257
48.51	96.8223	3.01257
48.657	96.8223	3.01257
48.804	96.8223	3.01257
48.951	96.8223	3.01257
49.098	96.8223	3.01257
49.245	96.8223	3.01257
49.392	96.8223	3.01257
49.539	96.8223	3.01257
49.686	96.8223	3.01257
49.833	96.8223	3.01257
49.98	96.8223	3.01257
50.127	96.8223	3.01257
50.274	96.8223	3.01257
50.421	96.8223	3.01257
50.568	96.8223	3.01257
50.715	96.6459	3.39118
50.862	96.6459	3.39118
51.009	96.6459	3.39118
51.156	96.6459	3.39118
51.303	96.6459	3.39118
51.45	96.6459	3.39118
51.597	96.6459	3.39118
51.744	96.6459	3.39118
51.891	96.6459	3.39118
52.038	96.6459	3.39118
52.185	96.6459	3.39118
52.332	96.6459	3.39118
52.479	96.6459	3.39118
52.626	96.6459	3.39118
52.773	96.6459	3.39118
52.92	96.6459	3.39118
53.067	96.6459	3.39118
53.214	96.6459	3.39118
53.361	96.6459	3.39118
53.508	96.6459	3.39118
53.655	96.6459	3.39118
53.802	96.6459	3.39118
53.949	96.6459	3.39118
54.096	96.6459	3.39118
54.243	96.6459	3.39118
54.39	96.6459	3.39118
54.537	96.6459	3.39118
54.684	96.6459	3.39118
54.831	96.6459	3.39118
54.978	96.6459	3.39118
55.125	96.6459	3.39118
55.272	96.6459	3.39118
55.419	96.6459	3.39118
55.566	96.6459	3.39118
55.713	96.6459	3.39118
55.86	96.6459	3.39118
56.007	96.6459	3.39118
56.154	96.6459	3.39118
56.301	96.6459	3.39118
56.448	96.6459	3.39118
56.595	96.6459	3.39118
56.742	96.6459	3.39118
56.889	96.6459	3.39118
57.036	96.6459	3.39118
57.183	96.6459	3.39118
57.33	96.6459	3.39118
57.477	96.6459	3.39118
57.624	96.6459	3.39118
57.771	96.6459	3.39118
57.918	96.6459	3.39118
58.065	96.6459	3.39118
58.212	96.6459	3.39118
58.359	96.6459	3.39118
58.506	96.6459	3.39118
58.653	96.6459	3.39118
58.8	96.6459	3.39118
58.947	96.6459	3.39118
59.094	96.6459	3.39118
59.241	96.6459	3.39118
59.388	96.6459	3.39118
59.535	96.6459	3.39118
59.682	96.6459	3.39118
59.829	96.6459	3.39118
59.976	96.6459	3.39118
60.123	96.6459	3.39118
Number of independent experiments = 4-5
Number of vesicle measured: ~1000

## Sheet: Figure 2
Figure 2A						Figure 2B					Figure 2C
											Time (s)	Frequency
Time (s)	Normalized Fluorescence						Normalized number of vesicles				0.075	45.4545
	Vesicle 1	Vesicle 2	Outer ROI				Average	SD			0.225	17.0454
0.293	0.63459	0.73339	0.01144			Before Ca2+	100	0			0.375	10.5114
0.44	0.50086	0.61876	0			0.5 mM Ca2+	8	3			0.525	5.39773
0.586	0.64786	0.81962	0.05068								0.675	3.97727
0.733	0.47652	0.59415	0.00371			Number of independent experiments = 3					0.825	2.84091
0.88	0.64208	0.85904	0.12781			Number of vesicle measured: ~700					0.975	2.27273
1.026	0.77901	0.61205	0.06455								1.125	1.42045
1.173	0.68584	0.68657	0.14332								1.275	1.70455
1.32	0.71583	0.91239	0.09739								1.425	3.69318
1.466	0.78675	0.45473	0.09528								1.575	1.42045
1.613	0.67392	0.71446	0.0179								1.725	1.42045
1.76	0.58137	0.65852	0.06542								1.875	0.85227
1.906	0.66421	0.70017	0.10289								2.025	1.13636
2.053	0.75197	0.53064	0.06531								2.175	0.28409
2.2	0.71116	0.68382	0.14937								2.325	0
2.346	0.69383	0.8136	0.06304								2.475	0.28409
2.493	0.80101	0.76678	0.16642								2.625	0
2.64	0.57227	0.81325	0.14625								2.775	0.28409
2.786	0.64135	0.58399	0.01629
2.933	0.82977	0.65336	0.11542								Number of independent experiments = 3
3.08	0.56674	1	0.05621								Number of vesicle measured: ~900
3.226	0.53761	0.77883	0.11975
3.373	0.59267	0.73115	0.09052
3.52	0.67638	0.68451	0.17737
3.666	0.70575	0.77194	0.11209
3.813	0.49103	0.70379	0.1036
3.96	0.70858	0.76799	0.16285
4.106	0.79412	0.78072	0.11614
4.253	0.68695	0.66575	0.09524
4.4	1	0.6673	0.14781
4.546	0.7162	0.47143	0.14568
4.693	0.64073	0.8401	0.1228
4.84	0.68793	0.92978	0.10894
4.986	0.60521	0.65422	0.07563
5.133	0.67121	0.77091	0.09865
5.28	0.62992	0.52909	0.16441
5.426	0.77544	0.59053	0.06408
5.573	0.67625	0.80327	0.09001
5.72	0.65278	0.5852	0.10947
5.866	0.63459	0.58967	0.12158
6.013	0.70182	0.79294	0.21502
6.16	0.68473	0.70189	0.11878
6.306	0.7221	0.70895	0.06491
6.453	0.79019	0.7136	0.06626
6.6	0.59366	0.54286	0.13252
6.746	0.84427	0.89948	0.16715
6.893	0.66937	0.65783	0.13771
7.04	0.62906	0.73614	0.10444
7.186	0.67441	0.78003	0.1928
7.333	0.77876	0.74131	0.1137
7.48	0.71903	0.7475	0.10425
7.626	0.79044	0.66506	0.08499
7.773	0.89565	0.71704	0.08641
7.92	0.77421	0.62823	0.08044
8.066	0.77495	0.66299	0.14101
8.213	0.74017	0.69673	0.11289
8.36	0.64024	0.7358	0.07418
8.506	0.73623	0.86334	0.14123
8.653	0.69223	0.60155	0.06482
8.8	0.6647	0.69277	0.18387
8.946	0.67994	0.58485	0.17286
9.093	0.62672	0.62289	0.08357
9.24	0.65733	0.80465	0.22784
9.386	0.86185	0.70155	0.18173
9.533	0.7575	0.62547	0.09112
9.68	0.61394	0.63012	0.09788
9.826	0.64503	0.71962	0.05225
9.973	0.55297	0.48692	0.11711
10.12	0.72812	0.56024	0.06362
10.266	0.59452	0.6253	0.1062
10.413	0.71251	0.47177	0.08545
10.56	0.58395	0.56265	0.10013
10.706	0.67588	0.47418	0.0894
10.853	0.65462	0.57229	0.07437
11	0.63102	0.61429	0.09699
11.146	0.77827	0.79552	0.13097
11.293	0.64516	0.77797	0.1286
11.44	0.73255	0.71876	0.12783
11.586	0.63741	0.65835	0.07281
11.733	0.7795	0.50551	0.09555
11.88	0.65929	0.74286	0.14461
12.026	0.57657	0.47367	0.21066
12.173	0.71755	0.4296	0.33895
12.32	0.61787	0.35095	0.16882
12.466	0.57092	0.16781	0.20662
12.613	0.54142	0.15766	0.27712
12.76	0.36578	0.16093	0.26184
12.906	0.06514	0.10017	0.31531
13.053	0.0912	0.23821	0.35146
13.2	0.14897	0.36627	0.48217
13.346	0.07239	0.33046	0.43781
13.493	0.04142	0.28881	0.46069
13.64	0.04634	0.24561	0.41473
13.786	0.14417	0.37625	0.56379
13.933	0.08776	0.12565	0.63094
14.08	0.20477	0.37539	0.57664
14.226	0.15007	0.11463	0.58257
14.373	0.13692	0.20637	0.55054
14.52	0.12205	0.18589	0.5416
14.666	0.05629	0.27487	0.68144
14.813	0.11947	0.24458	0.7203
14.96	0.03663	0.19432	0.64372
15.106	0.06035	0.24096	0.66296
15.253	0.01069	0.32719	0.70355
15.4	0.15352	0.06024	0.7365
15.546	0.08161	0.1191	0.78175
15.693	0.06539	0.25164	0.74666
15.84	0.02114	0.28158	0.71882
15.986	0.18744	0.18107	0.7286
16.133	0.19248	0.24165	0.87217
16.28	0.23402	0.17522	0.8476
16.426	0.16212	0.08485	0.89371
16.573	0.07842	0.30757	0.84856
16.72	0.12303	0.12306	0.9147
16.866	0.09132	0.19243	0.89026
17.013	0.1765	0.18227	0.82098
17.16	0.06576	0.19673	0.82444
17.306	0.13483	0.19191	0.75487
17.453	0.10091	0.13563	0.83105
17.6	0.12426	0.23924	0.82516
17.746	0.09108	0.13735	0.79229
17.893	0.12131	0.25112	0.89157
18.04	0.0762	0.14355	0.83446
18.186	0.10644	0.24682	0.6955
18.333	0.1631	0.22668	0.8613
18.48	0.06391	0.13752	0.82705
18.626	0.10914	0.13769	0.83033
18.773	0.16986	0.15198	0.75585
18.92	0.08837	0.14957	0.7658
19.066	0.10398	0.17917	0.80513
19.213	0.04843	0.21515	0.87072
19.36	0.15622	0.17384	0.95262
19.506	0.13176	0.20258	0.80519
19.653	0.08309	0.22892	0.89059
19.8	0.0912	0.11325	0.85872
19.946	0.08333	0.23683	0.75654
20.093	0.06207	0.11239	0.84581
20.24	0.22001	0.22943	0.7904
20.386	0.21399	0.17797	0.85849
20.533	0.14086	0.2117	0.86309
20.68	0.08407	0.1167	0.8214
20.826	0.08186	0.29157	0.91073
20.973	0.02188	0.15456	0.86891
21.12	0.11738	0.31532	0.83226
21.266	0.23181	0	0.86073
21.413	0.07977	0.06902	0.76907
21.56	0.10939	0.09036	0.91492
21.706	0.02679	0.01721	0.83345
21.853	0.10841	0.22238	0.92526
22	0.05506	0.09071	0.86606
22.146	0.19444	0.13201	0.93524
22.293	0.07129	0.15491	0.88123
22.44	0.11185	0.17694	0.86251
22.586	0.21497	0.12117	0.97525
22.733	0.24435	0.18589	0.95021
22.88	0.18449	0.23305	0.92048
23.026	0.09599	0.18055	0.96119
23.173	0.14098	0.31893	0.94397
23.32	0.162	0.14217	0.84964
23.466	0.13139	0.21652	0.88565
23.613	0.04707	0.20172	0.75734
23.76	0.07756	0.22065	0.88253
23.906	0.16187	0.19845	0.88585
24.053	0.11922	0.1537	0.8669
24.2	0.13594	0.23356	0.92689
24.346	0.14516	0.20224	0.85575
24.493	0.19703	0.27917	0.78524
24.64	0.12721	0.22737	0.92105
24.786	0.09366	0.17332	0.8309
24.933	0.25221	0.20826	0.85059
25.08	0.16433	0.16833	0.86705
25.226	0.17146	0.24509	0.94408
25.373	0.09378	0.17573	0.85183
25.52	0.12402	0.25972	0.86993
25.666	0.10152	0.2043	0.92524
25.813	0.22616	0.26506	0.97017
25.96	0.14233	0.19983	0.93809
26.106	0.04031	0.27022	0.89494
26.253	0.10902	0.11824	0.98635
26.4	0.15585	0.12427	0.93707
26.546	0.22763	0.34733	0.93992
26.693	0.15364	0.16954	0.94732
26.84	0.18842	0.09656	0.84607
26.986	0.13373	0.21205	0.94887
27.133	0.08296	0.26867	0.88654
27.28	0.26315	0.14923	0.90685
27.426	0.12439	0.15869	0.87034
27.573	0.1674	0.22616	0.8557
27.72	0.14012	0.08107	0.8816
27.866	0.25639	0.22978	0.92965
28.013	0.21374	0.16592	0.97198
28.16	0.04843	0.23029	0.86277
28.306	0.11136	0.03064	0.97618
28.453	0.08776	0.28967	0.99888
28.6	0.19862	0.18296	0.88049
28.746	0.14	0.3	0.99039
28.893	0.06539	0.29329	0.94247
29.04	0.07559	0.18038	0.88906
29.186	0.11554	0.09122	0.94381
29.333	0.15978	0.22978	0.92844
29.48	0.15708	0.25628	0.89867
29.626	0	0.16317	1
29.773	0.1105	0.16609	0.90495
29.92	0.21657	0.29966	0.95048

## Sheet: Figure 2 - figure supplements
Figure 2 - figure supplement 1				Figure 2 - figure supplement 2
Time	Normalized Fluorescence signal			Time	Normalized Fluorescence signal
0	0.39795			0.147	0.08118
0.036	0.29528			0.294	0.04277
0.072	0.26038			0.441	0.09846
0.109	0.33488			0.588	0.02202
0.145	0.29317			0.735	0.05762
0.181	0.34306			0.882	0.12983
0.218	0.34783			1.029	0.11729
0.254	0.32348			1.176	0.10384
0.29	0.29073			1.323	0.10999
0.326	0.27199			1.47	0.10307
0.363	0.3332			1.617	0.06709
0.399	0.22064			1.764	0.07926
0.435	0.29302			1.911	0.04738
0.472	0.28571			2.058	0.11754
0.508	0.24636			2.205	0.03137
0.544	0.25773			2.352	0.05787
0.58	0.27191			2.499	0.11306
0.617	0.24458			2.646	0.13303
0.653	0.32925			2.793	0.11562
0.689	0.26186			2.94	0.08848
0.726	0.24907			3.087	0.13367
0.762	0.25672			3.234	0.13291
0.798	0.24943			3.381	0.12727
0.835	0.27359			3.528	0.10359
0.871	0.21241			3.675	0.09129
0.907	0.27547			3.822	0.09001
0.943	0.27516			3.969	0.05352
0.98	0.23113			4.116	0.12612
1.016	0.22091			4.263	0.11601
1.052	0.27004			4.41	0.14968
1.089	0.24471			4.557	0.09168
1.125	0.2017			4.704	0.10512
1.161	0.22808			4.851	0.10653
1.197	0.19711			4.998	0.11729
1.234	0.14316			5.145	0.16748
1.27	0			5.292	0.16978
1.306	0.03742			5.439	0.11805
1.343	0.07011			5.586	0.13009
1.379	0.13921			5.733	0.06466
1.415	0.08172			5.88	0.09168
1.452	0.17297			6.027	0.11268
1.488	0.08069			6.174	0.14571
1.524	0.12329			6.321	0.16146
1.56	0.229			6.468	0.1411
1.597	0.21456			6.615	0.06901
1.633	0.19351			6.762	0.07746
1.669	0.30732			6.909	0.12817
1.706	0.16216			7.056	0.09629
1.742	0.11667			7.203	0.05775
1.778	0.25596			7.35	0.16569
1.814	0.24201			7.497	0.06492
1.851	0.24041			7.644	0.10051
1.887	0.2355			7.791	0
1.923	0.25425			7.938	0.11152
1.96	0.28477			8.085	0.11524
1.996	0.33393			8.232	0.15301
2.032	0.24858			8.379	0.08476
2.068	0.32999			8.526	0.13457
2.105	0.21648			8.673	0.09373
2.141	0.23064			8.82	0.1219
2.177	0.28077			8.967	0.10948
2.214	0.29747			9.114	0.10487
2.25	0.20041			9.261	0.08656
2.286	0.20411			9.408	0.09462
2.323	0.21555			9.555	0.1219
2.359	0.19359			9.702	0.12023
2.395	0.24828			9.849	0.14046
2.431	0.27149			9.996	0.11383
2.468	0.30396			10.143	0.16325
2.504	0.26197			10.29	0.0799
2.54	0.27264			10.437	0.09488
2.577	0.24838			10.584	0.08079
2.613	0.22959			10.731	0.13111
2.649	0.23661			10.878	0.06005
2.685	0.23847			11.025	0.15173
2.722	0.27267			11.172	0.09347
2.758	0.26774			11.319	0.08796
2.794	0.22374			11.466	0.08976
2.831	0.2597			11.613	0.1283
2.867	0.20017			11.76	0.14635
2.903	0.2166			11.907	0.13521
2.939	0.24401			12.054	0.10717
2.976	0.31249			12.201	0.06697
3.012	0.34383			12.348	0.02817
3.048	0.28024			12.495	0.13124
3.085	0.2962			12.642	0.13892
3.121	0.30599			12.789	0.10871
3.157	0.2771			12.936	0.56428
3.194	0.30363			13.083	0.58067
3.23	0.21559			13.23	0.56581
3.266	0.24838			13.377	0.55736
3.302	0.2207			13.524	0.49513
3.339	0.19157			13.671	0.50141
3.375	0.20464			13.818	0.54814
3.411	0.21216			13.965	0.51677
3.448	0.2234			14.112	0.53355
3.484	0.29071			14.259	0.43828
3.52	0.2696			14.406	0.44097
3.556	0.29609			14.553	0.43137
3.593	0.27942			14.7	0.50013
3.629	0.24929			14.847	0.46684
3.665	0.25806			14.994	0.53137
3.702	0.22377			15.141	0.41767
3.738	0.28443			15.288	0.40781
3.774	0.21204			15.435	0.39257
3.811	0.25808			15.582	0.41754
3.847	0.25027			15.729	0.45198
3.883	0.25173			15.876	0.45736
3.919	0.27334			16.023	0.49488
3.956	0.27546			16.17	0.44853
3.992	0.24984			16.317	0.46978
4.028	0.21884			16.464	0.58118
4.065	0.23629			16.611	0.53828
4.101	0.29426			16.758	0.37798
4.137	0.29503			16.905	0.50051
4.173	0.20783			17.052	0.49808
4.21	0.24319			17.199	0.48399
4.246	0.18942			17.346	0.51229
4.282	0.2774			17.493	0.42382
4.319	0.27286			17.64	0.41588
4.355	0.2259			17.787	0.44046
4.391	0.29783			17.934	0.5347
4.427	0.22938			18.081	0.35711
4.464	0.23507			18.228	0.43534
4.5	0.22687			18.375	0.42625
4.536	0.25394			18.522	0.49373
4.573	0.2808			18.669	0.41588
4.609	0.21993			18.816	0.49424
4.645	0.22446			18.963	0.3621
4.682	0.29733			19.11	0.37554
4.718	0.29212			19.257	0.33099
4.754	0.16791			19.404	0.44597
4.79	0.22814			19.551	0.47388
4.827	0.2072			19.698	0.45083
4.863	0.21645			19.845	0.51178
4.899	0.21021			19.992	0.49129
4.936	0.17008			20.139	0.44328
4.972	0.18741			20.286	0.50141
5.008	0.17961			20.433	0.41357
5.044	0.2148			20.58	0.47759
5.081	0.21736			20.727	0.40461
5.117	0.16782			20.874	0.45327
5.153	0.2077			21.021	0.43726
5.19	0.18528			21.168	0.39744
5.226	0.21226			21.315	0.41396
5.262	0.17906			21.462	0.35198
5.298	0.18939			21.609	0.42817
5.335	0.16958			21.756	0.42663
5.371	0.2287			21.903	0.37913
5.407	0.13726			22.05	0.46031
5.444	0.2686			22.197	0.36312
5.48	0.19423			22.344	0.41946
5.516	0.26299			22.491	0.33175
5.553	0.22006			22.638	0.36082
5.589	0.18539			22.785	0.39731
5.625	0.14106			22.932	0.40179
5.661	0.22515			23.079	0.35531
5.698	0.25083			23.226	0.36889
5.734	0.21079			23.373	0.34955
5.77	0.21489			23.52	0.30115
5.807	0.16836			23.667	0.50986
5.843	0.18802			23.814	0.43227
5.879	0.23873			23.961	0.3758
5.915	0.22882			24.108	0.44878
5.952	0.16328			24.255	0.36236
5.988	0.20108			24.402	0.35851
6.024	0.18774			24.549	0.39962
6.061	0.20729			24.696	0.39949
6.097	0.22616			24.843	0.36146
6.133	0.19508			24.99	0.34955
6.169	0.25316			25.137	0.40973
6.206	0.22455			25.284	0.46837
6.242	0.31229			25.431	0.30819
6.278	0.26708			25.578	0.37298
6.315	0.19633			25.725	0.37772
6.351	0.23664			25.872	0.4452
6.387	0.19651			26.019	0.41447
6.424	0.20357			26.166	0.29641
6.46	0.18684			26.313	0.40128
6.496	0.30075			26.46	0.39603
6.532	0.16775			26.607	0.36172
6.569	0.26512			26.754	0.38259
6.605	0.22983			26.901	0.28259
6.641	0.2393			27.048	0.35493
6.678	0.21687			27.195	0.32625
6.714	0.21405			27.342	0.23598
6.75	0.25149			27.489	0.44981
6.786	0.22417			27.636	0.28976
6.823	0.22889			27.783	0.35903
6.859	0.24386			27.93	0.38399
6.895	0.22669			28.077	0.40461
6.932	0.26721			28.224	0.36415
6.968	0.26193			28.371	0.29846
7.004	0.25529			28.518	0.27823
7.041	0.26173			28.665	0.39641
7.077	0.28235			28.812	0.3799
7.113	0.2323			28.959	0.32714
7.149	0.28041			29.106	1
7.186	0.25241			29.253	0.37119
7.222	0.18549			29.4	0.3315
7.258	0.29471			29.547	0.25967
7.295	0.26049			29.694	0.11985
7.331	0.24382			29.841	0.2032
7.367	0.22395			29.988	0.19321
7.403	0.20785			30.135	0.09052
7.44	0.31325			30.282	0.19052
7.476	0.25801			30.429	0.17222
7.512	0.23574			30.576	0.14699
7.549	0.26594			30.723	0.16863
7.585	0.26955			30.87	0.15787
7.621	0.24297			31.017	0.11754
7.657	0.28014			31.164	0.14136
7.694	0.2252			31.311	0.12535
7.73	0.27965			31.458	0.11293
7.766	0.27929			31.605	0.15749
7.803	0.29417			31.752	0.09731
7.839	0.26273			31.899	0.07746
7.875	0.28178			32.046	0.15787
7.912	0.29101			32.193	0.13816
7.948	0.29064			32.34	0.1379
7.984	0.30489			32.487	0.07388
8.02	0.29397			32.634	0.03636
8.057	0.28497			32.781	0.09936
8.093	0.22345			32.928	0.079
8.129	0.24832			33.075	0.09129
8.166	0.31478			33.222	0.07145
8.202	0.21418			33.369	0.08732
8.238	0.29114			33.516	0.0548
8.274	0.26294			33.663	0.09462
8.311	0.25706			33.81	0.08335
8.347	0.24882			33.957	0.09091
8.383	0.26528			34.104	0.10026
8.42	0.13037			34.251	0.04802
8.456	0.19785			34.398	0.06453
8.492	0.21109			34.545	0.04968
8.528	0.24309			34.692	0.10691
8.565	0.22038			34.839	0.04558
8.601	0.2606			34.986	0.10653
8.637	0.2175			35.133	0.07298
8.674	0.16239			35.28	0.14827
8.71	0.23744			35.427	0.15339
8.746	0.21177			35.574	0.09475
8.783	0.18837			35.721	0.07401
8.819	0.19265			35.868	0.15198
8.855	0.22901			36.015	0.07286
8.891	0.21732			36.162	0.12318
8.928	0.22129			36.309	0.1516
8.964	0.27631			36.456	0.20192
9	0.26094			36.603	0.0968
9.037	0.2156			36.75	0.09373
9.073	0.23001			36.897	0.0516
9.109	0.25269			37.044	0.08092
9.145	0.26025			37.191	0.08886
9.182	0.22909			37.338	0.10064
9.218	0.20997			37.485	0.1073
9.254	0.21795			37.632	0.14251
9.291	0.30898			37.779	0.0822
9.327	0.23641			37.926	0.14341
9.363	0.19271			38.073	0.06223
9.4	0.1976			38.22	0.12971
9.436	0.20537			38.367	0.08143
9.472	0.25684			38.514	0.11152
9.508	0.25381			38.661	0.1356
9.545	0.11953			38.808	0.09232
9.581	0.21915			38.955	0.09846
9.617	0.28704			39.102	0.03086
9.654	0.30557			39.249	0.13316
9.69	0.21334			39.396	0.05032
9.726	0.23347			39.543	0.12382
9.762	0.21279			39.69	0.06812
9.799	0.27808			39.837	0.1589
9.835	0.3356			39.984	0.11895
9.871	0.24456			40.131	0.14315
9.908	0.20903			40.278	0.14481
9.944	0.3283			40.425	0.13752
9.98	0.25342			40.572	0.15006
10.016	0.30945			40.719	0.05992
10.053	0.26043			40.866	0.0758
10.089	0.31921			41.013	0.05595
10.125	0.34949			41.16	0.1
10.162	0.32858			41.307	0.14366
10.198	0.29895			41.454	0.21216
10.234	0.30959			41.601	0.07542
10.271	0.26785			41.748	0.06709
10.307	0.27365			41.895	0.10243
10.343	0.28601			42.042	0.06005
10.379	0.28767			42.189	0.12138
10.416	0.27334			42.336	0.10243
10.452	0.33798			42.483	0.04328
10.488	0.34489			42.63	0.11549
10.525	0.35658			42.777	0.03175
10.561	0.32545			42.924	0.13457
10.597	0.34284			43.071	0.02817
10.633	0.3541			43.218	0.10679
10.67	0.37711			43.365	0.11383
10.706	0.34792			43.512	0.08284
10.742	0.33346			43.659	0.07593
10.779	0.32139			43.806	0.05583
10.815	0.31685			43.953	0.10435
10.851	0.26175			44.1	0.07964
10.887	0.28216			44.247	0.03956
10.924	0.24788			44.394	0.11204
10.96	0.24403			44.541	0.09424
10.996	0.23375			44.688	0.063
11.033	0.24531			44.835	0.07414
11.069	0.17985			44.982	0.12407
11.105	0.23846			45.129	0.08707
11.142	0.25604			45.276	0.08732
11.178	0.22144			45.423	0.1283
11.214	0.2288			45.57	0.08003
11.25	0.27183			45.717	0.00218
11.287	0.24683			45.864	0.07209
11.323	0.26121			46.011	0.10589
11.359	0.26134			46.158	0.09846
11.396	0.2813			46.305	0.06287
11.432	0.2175			46.452	0.06479
11.468	0.24109			46.599	0.06837
11.504	0.24474			46.746	0.06376
11.541	0.21623			46.893	0.06837
11.577	0.23859			47.04	0.08028
11.613	0.19042			47.187	0.1023
11.65	0.16776			47.334	0.05224
11.686	0.193			47.481	0.05621
11.722	0.2429			47.628	0.03995
11.758	0.19013			47.775	0.0822
11.795	0.22195			47.922	0.0516
11.831	0.2475			48.069	0.0872
11.867	0.21272			48.216	0.10423
11.904	0.23398			48.363	0.14033
11.94	0.24687			48.51	0.09513
11.976	0.22439			48.657	0.06428
12.013	0.25356			48.804	0.02087
12.049	0.20754			48.951	0.07439
12.085	0.24236			49.098	0.04917
12.121	0.23297			49.245	0.0525
12.158	0.19275			49.392	0.03828
12.194	0.27563			49.539	0.09117
12.23	0.25891			49.686	0.0598
12.267	0.28558			49.833	0.0831
12.303	0.30601			49.98	0.06863
12.339	0.27108			50.127	0.11396
12.375	0.29738			50.274	0.07081
12.412	0.20881
12.448	0.27601
12.484	0.23572
12.521	0.24048
12.557	0.25482
12.593	0.25365
12.63	0.23347
12.666	0.19431
12.702	0.22318
12.738	0.19235
12.775	0.20615
12.811	0.2659
12.847	0.25053
12.884	0.26033
12.92	0.15015
12.956	0.2525
12.992	0.25797
13.029	0.21198
13.065	0.27435
13.101	0.20919
13.138	0.17457
13.174	0.22045
13.21	0.20216
13.246	0.25568
13.283	0.21707
13.319	0.18522
13.355	0.20678
13.392	0.27327
13.428	0.2305
13.464	0.25633
13.501	0.17856
13.537	0.22595
13.573	0.19962
13.609	0.24465
13.646	0.11739
13.682	0.19058
13.718	0.23871
13.755	0.2217
13.791	0.24107
13.827	0.17681
13.863	0.19701
13.9	0.21679
13.936	0.21866
13.972	0.18614
14.009	0.2306
14.045	0.21871
14.081	0.17338
14.117	0.17186
14.154	0.2383
14.19	0.23321
14.226	0.1868
14.263	0.18752
14.299	0.20755
14.335	0.24472
14.372	0.20002
14.408	0.24889
14.444	0.23027
14.48	0.19142
14.517	0.24723
14.553	0.24564
14.589	0.2376
14.626	0.18869
14.662	0.23382
14.698	0.22044
14.734	0.2398
14.771	0.2511
14.807	0.26518
14.843	0.22673
14.88	0.17979
14.916	0.33541
14.952	0.24147
14.989	0.23007
15.025	0.2722
15.061	0.2658
15.097	0.20378
15.134	0.20648
15.17	0.20285
15.206	0.20818
15.243	0.26425
15.279	0.29704
15.315	0.23276
15.351	0.25399
15.388	0.28045
15.424	0.26885
15.46	0.25579
15.497	0.24912
15.533	0.29395
15.569	0.27371
15.605	0.25118
15.642	0.242
15.678	0.3038
15.714	0.309
15.751	0.27019
15.787	0.24959
15.823	0.27028
15.86	0.29505
15.896	0.26657
15.932	0.30794
15.968	0.29923
16.005	0.29147
16.041	0.28102
16.077	0.33961
16.114	0.28182
16.15	0.29868
16.186	0.27425
16.222	0.3191
16.259	0.31185
16.295	0.28092
16.331	0.25798
16.368	0.31701
16.404	0.33258
16.44	0.32681
16.476	0.22422
16.513	0.29573
16.549	0.2752
16.585	0.28012
16.622	0.33965
16.658	0.32504
16.694	0.29441
16.731	0.32064
16.767	0.275
16.803	0.28649
16.839	0.25409
16.876	0.31905
16.912	0.33522
16.948	0.31879
16.985	0.30769
17.021	0.26536
17.057	0.31029
17.093	0.29029
17.13	0.37599
17.166	0.33024
17.202	0.32621
17.239	0.25751
17.275	0.32195
17.311	0.37509
17.347	0.35716
17.384	0.3504
17.42	0.33615
17.456	0.35974
17.493	0.32283
17.529	0.33349
17.565	0.38964
17.602	0.31898
17.638	0.43582
17.674	0.36307
17.71	0.36203
17.747	0.34595
17.783	0.42098
17.819	0.34272
17.856	0.36596
17.892	0.34482
17.928	0.38059
17.964	0.42312
18.001	0.30933
18.037	0.35041
18.073	0.34547
18.11	0.33725
18.146	0.39494
18.182	0.37759
18.219	0.34764
18.255	0.40076
18.291	0.36021
18.327	0.35217
18.364	0.35928
18.4	0.3626
18.436	0.35241
18.473	0.40519
18.509	0.40391
18.545	0.37401
18.581	0.38543
18.618	0.36434
18.654	0.35645
18.69	0.40633
18.727	0.38064
18.763	0.37825
18.799	0.39054
18.835	0.41463
18.872	0.36638
18.908	0.39526
18.944	0.43483
18.981	0.37949
19.017	0.4168
19.053	0.42667
19.09	0.39272
19.126	0.37116
19.162	0.36001
19.198	0.37568
19.235	0.4165
19.271	0.42246
19.307	0.42699
19.344	0.41948
19.38	0.47297
19.416	0.47057
19.452	0.41773
19.489	0.42139
19.525	0.42082
19.561	0.41982
19.598	0.35853
19.634	0.37387
19.67	0.46578
19.706	0.35126
19.743	0.44053
19.779	0.42437
19.815	0.38663
19.852	0.43891
19.888	0.40061
19.924	0.41093
19.961	0.41001
19.997	0.39303
20.033	0.40997
20.069	0.39348
20.106	0.38321
20.142	0.44114
20.178	0.39357
20.215	0.38756
20.251	0.36499
20.287	0.36321
20.323	0.4545
20.36	0.39511
20.396	0.38141
20.432	0.45239
20.469	0.40725
20.505	0.37375
20.541	0.39096
20.577	0.45101
20.614	0.43445
20.65	0.37232
20.686	0.38726
20.723	0.32416
20.759	0.45168
20.795	0.43251
20.832	0.41454
20.868	0.39034
20.904	0.43195
20.94	0.43622
20.977	0.4624
21.013	0.36611
21.049	0.40566
21.086	0.39215
21.122	0.43407
21.158	0.38258
21.194	0.34371
21.231	0.41235
21.267	0.48474
21.303	0.46938
21.34	0.45049
21.376	0.47848
21.412	0.40432
21.449	0.45283
21.485	0.43601
21.521	0.47488
21.557	0.50093
21.594	0.40316
21.63	0.42862
21.666	0.3987
21.703	0.42672
21.739	0.35803
21.775	0.35163
21.811	0.40626
21.848	0.43614
21.884	0.38486
21.92	0.40652
21.957	0.38326
21.993	0.39903
22.029	0.42342
22.065	0.44611
22.102	0.44221
22.138	0.36796
22.174	0.38502
22.211	0.41173
22.247	0.42355
22.283	0.39452
22.32	0.40641
22.356	0.39341
22.392	0.39748
22.428	0.44057
22.465	0.4688
22.501	0.41708
22.537	0.42408
22.574	0.422
22.61	0.3975
22.646	0.44409
22.682	0.3469
22.719	0.46713
22.755	0.43461
22.791	0.46758
22.828	0.46319
22.864	0.39504
22.9	0.42454
22.936	0.50598
22.973	0.39784
23.009	0.43431
23.045	0.43305
23.082	0.43434
23.118	0.40268
23.154	0.38305
23.191	0.42029
23.227	0.40836
23.263	0.43837
23.299	0.40961
23.336	0.38315
23.372	0.41928
23.408	0.46689
23.445	0.36447
23.481	0.42764
23.517	0.41053
23.553	0.42999
23.59	0.34705
23.626	0.45659
23.662	0.57438
23.699	0.76963
23.735	0.79386
23.771	0.87717
23.808	0.89042
23.844	0.89961
23.88	0.87235
23.916	0.91798
23.953	0.95362
23.989	0.93253
24.025	0.93332
24.062	0.91061
24.098	0.87302
24.134	0.95608
24.17	0.9217
24.207	0.88657
24.243	0.96865
24.279	0.98937
24.316	0.95108
24.352	0.95229
24.388	0.90906
24.424	0.94504
24.461	0.88902
24.497	0.91311
24.533	0.9364
24.57	0.93239
24.606	0.96998
24.642	0.97924
24.679	1
24.715	0.92581
24.751	0.93849
24.787	0.92859
24.824	0.93234
24.86	0.96336
24.896	0.932
24.933	0.97943
24.969	0.88544
25.005	0.95032
25.041	0.85292
25.078	0.872
25.114	0.93806
25.15	0.99108
25.187	0.95862
25.223	0.99219
25.259	0.98451
25.295	0.878
25.332	0.90802
25.368	0.88949
25.404	0.93865
25.441	0.87418
25.477	0.95287
25.513	0.96434
25.55	0.94537
25.586	0.93274
25.622	0.91486
25.658	0.93326
25.695	0.90929
25.731	0.87142
25.767	0.90995
25.804	0.90954
25.84	0.88457
25.876	0.86937
25.912	0.8596
25.949	0.93441
25.985	0.87808
26.021	0.96806
26.058	0.90132
26.094	0.89264
26.13	0.89963
26.166	0.89367
26.203	0.95963
26.239	0.89853
26.275	0.87604
26.312	0.8851
26.348	0.90708
26.384	0.92108
26.421	0.92057
26.457	0.88206
26.493	0.90877
26.529	0.8814
26.566	0.95815
26.602	0.91758
26.638	0.90456
26.675	0.88683
26.711	0.91105
26.747	0.97527
26.783	0.94263
26.82	0.89172
26.856	0.9105
26.892	0.87559
26.929	0.93169
26.965	0.87942
27.001	0.91812
27.038	0.89962
27.074	0.91459
27.11	0.85314
27.146	0.92027
27.183	0.87631
27.219	0.90175
27.255	0.92052
27.292	0.95415
27.328	0.93985
27.364	0.90624
27.4	0.86581
27.437	0.91412
27.473	0.97892
27.509	0.92599
27.546	0.90387
27.582	0.84529
27.618	0.91526
27.654	0.99978
27.691	0.9107
27.727	0.90923
27.763	0.97585
27.8	0.86799
27.836	0.89022
27.872	0.94146
27.909	0.91925
27.945	0.9371
27.981	0.92298
28.017	0.91822
28.054	0.96075
28.09	0.97511
28.126	0.87368
28.163	0.88734
28.199	0.93003
28.235	0.96274
28.271	0.9842
28.308	0.96052
28.344	0.89903
28.38	0.93645
28.417	0.95146
28.453	0.91029
28.489	0.88019
28.525	0.88993
28.562	0.90615
28.598	0.89587
28.634	0.91668
28.671	0.90375
28.707	0.85886
28.743	0.94611
28.78	0.92789
28.816	0.79106
28.852	0.91126
28.888	0.9334
28.925	0.87051
28.961	0.92004
28.997	0.98539
29.034	0.90508
29.07	0.89103
29.106	0.93142
29.142	0.89346
29.179	0.95073
29.215	0.88156
29.251	0.9407
29.288	0.93156
29.324	0.83643
29.36	0.90044
29.396	0.92038
29.433	0.88458
29.469	0.87963
29.505	0.93905
29.542	0.84255
29.578	0.85
29.614	0.9509
29.651	0.84388
29.687	0.89881
29.723	0.93254
29.759	0.85273
29.796	0.86942
29.832	0.90449
29.868	0.88561
29.905	0.84771
29.941	0.84844
29.977	0.8529
30.013	0.86959
30.05	0.86753
30.086	0.84142
30.122	0.8803
30.159	0.86514
30.195	0.88794
30.231	0.89711
30.268	0.8706
30.304	0.80451
30.34	0.78037
30.376	0.81996
30.413	0.86213
30.449	0.80087
30.485	0.76031
30.522	0.86663
30.558	0.8745
30.594	0.88885
30.63	0.79941
30.667	0.83749
30.703	0.78181
30.739	0.85517
30.776	0.9501
30.812	0.75965
30.848	0.81011
30.884	0.83977
30.921	0.84429
30.957	0.86044
30.993	0.83786
31.03	0.85457
31.066	0.85119
31.102	0.82757
31.139	0.83933
31.175	0.78624
31.211	0.83674
31.247	0.83656
31.284	0.84554
31.32	0.82948
31.356	0.82736
31.393	0.73795
31.429	0.76889
31.465	0.83067
31.501	0.82004
31.538	0.80084
31.574	0.81237
31.61	0.7955
31.647	0.79751
31.683	0.78977
31.719	0.7729
31.755	0.74104
31.792	0.78348
31.828	0.80142
31.864	0.77445
31.901	0.76299
31.937	0.75651
31.973	0.75222
32.01	0.74761
32.046	0.83214
32.082	0.77106
32.118	0.79099
32.155	0.76924
32.191	0.73758
32.227	0.75664
32.264	0.75718
32.3	0.75642
32.336	0.72703
32.372	0.74871
32.409	0.73722
32.445	0.75145
32.481	0.72842
32.518	0.74111
32.554	0.74479
32.59	0.74281
32.626	0.75919
32.663	0.72175
32.699	0.74485
32.735	0.73449
32.772	0.79207
32.808	0.76016
32.844	0.74995
32.881	0.73738
32.917	0.71782
32.953	0.76594
32.989	0.73601
33.026	0.72265
33.062	0.81001
33.098	0.7555
33.135	0.74903
33.171	0.67307
33.207	0.72365
33.243	0.69909
33.28	0.75926
33.316	0.76335
33.352	0.73268
33.389	0.72408
33.425	0.65062
33.461	0.76132
33.498	0.80244
33.534	0.77675
33.57	0.71214
33.606	0.75539
33.643	0.78608
33.679	0.74761
33.715	0.75934
33.752	0.72855
33.788	0.73283
33.824	0.77063
33.86	0.76319
33.897	0.74785
33.933	0.69669
33.969	0.81519
34.006	0.70877
34.042	0.78453
34.078	0.75121
34.114	0.8069
34.151	0.7615
34.187	0.76243
34.223	0.76595
34.26	0.67504
34.296	0.78609
34.332	0.76011
34.369	0.81536
34.405	0.74763
34.441	0.81701
34.477	0.81409
34.514	0.78785
34.55	0.76768
34.586	0.72025
34.623	0.82926
34.659	0.7742
34.695	0.77298
34.731	0.77403
34.768	0.80796
34.804	0.73462
34.84	0.78285
34.877	0.73148
34.913	0.75454
34.949	0.73639
34.985	0.78546
35.022	0.73163
35.058	0.72002
35.094	0.77121
35.131	0.75308
35.167	0.7497
35.203	0.79102
35.24	0.79973
35.276	0.77043
35.312	0.78979
35.348	0.76683
35.385	0.78772
35.421	0.75817
35.457	0.74131
35.494	0.76709
35.53	0.77104
35.566	0.73601
35.602	0.70771
35.639	0.77413
35.675	0.71181
35.711	0.77097
35.748	0.66835
35.784	0.71356
35.82	0.74252
35.857	0.75638
35.893	0.76863
35.929	0.77618
35.965	0.70123
36.002	0.73787
36.038	0.79893
36.074	0.74718
36.111	0.73829
36.147	0.77482
36.183	0.6725
36.219	0.70586
36.256	0.77828
Data shown in inset is highlighted in red

## Sheet: Figure 3
Figure 3A						Figure 3B
	Number of docked vesicles						Number of docked vesicles
	Average	SD					Average	SD
Before buffer wash	100	0				Before CDT wash	100	0
After buffer wash	4.2	0.8				After CDT wash	90.9	2.1
						1mM Ca2+	10.1	1.2
Number of independent experiments = 4
Number of vesicle measured: ~200						Number of independent experiments = 5
						Number of vesicle measured: ~250

## Sheet: Figure 4
Figure 4A															Figure 4B
Time (s)		Survival Percentages														Normalized number of docked vesicles				Number of vesicles measured
	No Syt1		Syt1WT		Syt1F349A		Syt1Q		Syt1DA		Syt1LLQQ					Before Ca2+		After Ca2+
	average	SD	average	SD	average	SD	average	SD	average	SD	average	SD				Average	SD	Average	SD
0.147	100	0	100	0	100	0	100	0	100	0	100	0			Syt1WT	100	0	8.5	3.6	~250 vesicles
0.294	100	0	100	0	100	0	100	0	100	0	99.952	0.25			Syt1F349A	100	0	10	2	~50 vesicles
0.441	91.3751	5.85626	100	0	98.57	1.276	99.24	1.765	100	0	99.86	0.275			Syt1DA	100	0	97.8	2.1	~200 vesicles
0.588	79.2534	8.6932	99.656	0.595	95.977	1.554	96.34	1.52	99.363	0.74	99.753	0.265			Syt1LLQQ	100	0	7.1	2.5	~150 vesicles
0.735	70.8259	8.42167	99.333	0.579	94.752	2.548	90.15	2.207	99.363	0.74	99.702	0.638			Syt1Q	N.D.	N.D.	N.D	N.D	~10 vesicles
0.882	55.4972	6.24549	98.685	1.477	89.513	3.443	86.84	1.812	99.363	0.74	99.635	0.516
1.029	46.7944	3.7025	97.998	1.736	85.376	3.75	83.21	2.34	99.363	0.74	99.635	0.516				Number of independent experiments = 4
1.176	39.2215	4.51456	97.675	2.052	80.854	3.337	79.54	3.538	99.363	0.74	99.635	0.516
1.323	35.0991	7.70401	97.331	2.315	75.948	1.973	73.15	4.127	99.363	0.74	99.635	0.516
1.47	30.2289	5.65384	96.664	2.893	73.243	4.436	70.08	4.746	99.363	0.74	99.635	0.516
1.617	26.1989	6.70742	95.809	1.417	70.329	4.046	65.12	4.746	99.363	0.74	99.27	0.54
1.764	24.7793	6.45333	95.809	1.417	66.996	3.659	61.41	4.364	98.57	0.955	99.27	0.14
1.911	22.4125	7.33306	95.809	1.417	62.372	4.225	59.11	3.837	98.57	0.955	98.54	0.25
2.058	16.9773	4.47793	95.465	1.832	59.922	6.011	54.33	3.233	98.57	0.955	98.54	0.35
2.205	16.9773	4.47793	95.465	1.832	56.159	2.923	51.11	3.828	98.57	0.955	97.08	1.032
2.352	15.5577	4.15521	95.465	1.832	53.337	1.721	47.41	3.598	98.57	0.955	97.08	1.032
2.499	14.9927	3.18111	95.465	1.832	48.715	3.358	43.81	3.101	98.57	0.955	95.62	1.032
2.646	11.3131	1.90608	95.465	1.832	44.92	3.16	39.71	3.812	98.57	0.955	95.62	1.032
2.793	10.4584	2.92134	95.465	1.832	43.542	4.367	36.87	3.791	98.57	0.955	95.62	1.032
2.94	9.55754	1.64686	95.465	1.832	40.656	5.317	33.12	4.426	97.94	0.387	95.255	1.032
3.087	8.99256	1.6225	95.465	1.832	38.225	3.308	31.71	2.356	97.94	0.387	95.255	1.032
3.234	8.42759	2.11377	95.122	2.326	34.825	2.291	29.87	2.654	97.94	0.387	95.255	1.032
3.381	8.42759	2.11377	95.122	2.326	33.754	2.927	27.14	3.593	97.94	0.387	95.255	1.032
3.528	7.52669	0.67953	95.122	2.326	31.964	1.674	25.11	3.601	97.94	0.387	95.255	1.032
3.675	6.62579	1.15119	94.267	1.292	30.34	1.352	24.65	3.752	97.94	0.387	94.526	1.032
3.822	6.62579	1.15119	94.267	1.292	29.612	0.932	23.11	2.677	97.94	0.387	94.161	1.032
3.969	6.62579	1.15119	94.267	1.292	28.528	1.188	22.08	2.654	97.94	0.387	94.161	1.032
4.116	6.62579	1.15119	93.412	1.52	27.455	2.067	21.78	3.593	97.623	1.858	94.161	1.032
4.263	6.62579	1.15119	93.412	1.52	25.986	1.338	21.14	3.601	97.623	1.186	94.161	1.032
4.41	6.62579	1.15119	93.412	1.52	25.002	1.437	20.51	3.752	97.623	1.186	94.161	1.032
4.557	6.06082	1.42198	93.412	1.52	24.107	0.818	20.14	2.677	97.623	1.186	94.161	1.032
4.704	6.06082	1.42198	93.412	1.52	23.175	1.094	19.61	3.253	97.222	1.186	94.161	1.032
4.851	6.06082	1.42198	93.412	1.52	22.512	1.783	18.54	2.939	97.222	1.186	94.161	1.032
4.998	6.06082	1.42198	93.412	1.52	22.359	2.027	18.21	2.199	97.222	1.186	94.161	1.032
5.145	6.06082	1.42198	93.412	1.52	22.09	1.687	17.54	3.256	97.222	1.186	94.161	1.032
5.292	6.06082	1.42198	93.412	1.52	21.143	0.845	17.11	3.256	97.222	1.186	94.161	1.032
5.439	6.06082	1.42198	93.412	1.52	20.685	1.633	17.11	1.952	97.222	1.186	93.431	2.065
5.586	6.06082	1.42198	92.558	2.708	20.226	2.425	16.32	1.952	97.222	1.186	93.431	2.065
5.733	6.06082	1.42198	92.558	2.708	20.073	2.689	16.31	1.952	96.822	1.186	93.431	2.065
5.88	6.06082	1.42198	92.558	2.708	19.498	2.993	16.11	1.952	96.822	1.186	93.431	2.065
6.027	6.06082	1.42198	92.558	2.708	19.294	2.805	15.22	1.617	96.822	1.186	93.431	2.065
6.174	5.49585	2.15266	92.558	2.708	18.988	3.335	15.21	1.617	96.377	1.309	93.431	2.065
6.321	5.49585	2.15266	92.558	2.708	18.413	3.648	15.21	1.617	96.377	1.309	93.431	2.065
6.468	5.49585	2.15266	92.558	2.708	17.876	3.37	15.21	1.617	96.377	1.309	93.431	2.065
6.615	5.49585	2.15266	92.558	2.708	17.671	3.107	14.84	1.65	96.377	1.309	93.431	2.065
6.762	5.49585	2.15266	92.558	2.708	17.467	2.863	13.21	1.06	96.377	1.309	92.336	0.516
6.909	5.49585	2.15266	92.558	2.708	17.262	2.645	13.21	1.382	96.377	1.309	91.971	0.516
7.056	5.49585	2.15266	92.558	2.708	17.262	2.645	13.21	1.382	96.377	1.309	91.606	0.816
7.203	5.49585	2.15266	92.558	2.708	16.994	2.485	13.14	1.382	96.377	1.309	91.606	0.816
7.35	5.49585	2.15266	92.558	2.708	16.994	2.485	12.3	1.968	95.977	1.941	91.606	0.816
7.497	5.49585	2.15266	92.558	2.708	16.636	2.511	12.31	1.968	95.977	1.941	91.606	0.816
7.644	5.49585	2.15266	92.558	2.708	16.636	2.511	12.31	1.968	95.977	1.941	91.606	0.816
7.791	5.49585	2.15266	92.558	2.708	16.432	2.313	11.47	1.23	95.977	1.941	91.606	0.816
7.938	5.49585	2.15266	92.558	2.708	16.163	2.123	11.47	1.23	95.977	1.941	91.606	0.816
8.085	5.49585	2.15266	92.558	2.708	15.805	2.171	11.47	1.23	95.977	1.941	91.606	0.816
8.232	5.49585	2.15266	92.558	2.708	15.805	2.171	11.47	1.23	95.977	1.941	91.606	0.816
8.379	4.59495	2.70431	92.558	2.708	15.805	2.171	11.47	1.23	95.323	2.183	91.606	0.816
8.526	4.59495	2.70431	92.558	2.708	15.652	2.435	11.47	1.23	95.323	2.183	91.606	0.816
8.673	4.59495	2.70431	92.558	2.708	15.5	2.7	11.47	1.23	95.323	2.183	91.606	0.816
8.82	4.59495	2.70431	92.558	2.708	15.5	2.7	11.47	1.23	95.323	2.183	91.606	0.816
8.967	4.59495	2.70431	92.558	2.708	15.5	2.7	11.47	1.23	94.752	2.215	91.606	0.816
9.114	4.59495	2.70431	92.558	2.708	15.5	2.7	11.47	1.23	94.752	2.215	91.606	0.816
9.261	4.59495	2.70431	92.558	2.708	15.5	2.7	11.47	1.23	94.752	2.215	91.606	0.816
9.408	4.59495	2.70431	92.558	2.708	15.347	2.964	11.47	1.23	94.752	2.215	91.241	1.032
9.555	4.59495	2.70431	92.558	2.708	15.347	2.964	11.47	1.23	94.752	2.215	91.241	1.032
9.702	4.59495	2.70431	92.558	2.708	15.142	2.791	11.47	1.23	94.752	2.215	91.241	1.032
9.849	4.59495	2.70431	92.558	2.708	15.142	2.791	11.47	1.23	94.752	2.215	91.241	1.032
9.996	4.59495	2.70431	92.558	2.708	15.142	2.791	11.47	1.23	94.752	2.215	91.241	1.032
	Number of independent experiments = 3-4
	Number of vesicle measured: ~250 vesicles per condition

## Sheet: Figure 5
Figure 5A													Figure 5B
Time (s)		Survival Percentages												Normalized number of docked vesicles				Number of vesicles measured
	No Syt1		Syt1WT		Syt1F349A		Syt1Q		Syt1LLQQ					Before Ca2+		After Ca2+
	average	SD	average	SD	average	SD	average	SD	average	SD				Average	SD	Average	SD
0.147	100	0	99.804	0.307	100	0	100	0	100	0			Syt1WT	100	0	7.2	2.8	~200 vesicles
0.294	94.998	7.38	99.627	0.649	100	0	100	0	99.864	0.192			Syt1F349A	100	0	94.6	4.7	~200 vesicles
0.441	85.39	12.39	99.627	0.649	100	0	100	0	99.187	0.383			Syt1Q	100	0	83.1	6.5	~150 vesicles
0.588	67.139	12.737	99.539	0.851	99.363	0.74	99.24	0.843	98.78	0.575			Syt1LLQQ	100	0	26.4	1.6	~150 vesicles
0.735	49.452	9.611	99.539	0.851	99.363	0.74	99.31	0.843	98.645	0.383
0.882	39.41	8.73	99.363	1.27	99.363	0.74	98.32	0.813	98.103	0.383				Number of independent experiments = 3
1.029	29.809	6.797	99.363	1.27	99.363	0.74	98.32	0.813	98.103	0.383
1.176	22.768	6.115	99.363	1.27	99.363	0.74	98.32	0.813	97.696	0.192
1.323	17.632	4.91	99.363	1.27	99.363	0.74	98.32	0.813	97.696	0.192
1.47	11.166	6.385	99.363	1.27	99.363	0.74	98.32	0.813	97.29	0.767
1.617	9.501	5.29	99.363	1.27	99.363	0.74	97.21	0.817	97.154	0.958
1.764	8.117	4.662	99.274	1.482	98.57	0.955	97.21	0.817	97.154	0.958
1.911	6.69	3.983	99.274	1.482	98.57	0.955	97.21	0.817	96.883	0.575
2.058	6.171	3.666	99.274	1.482	98.57	0.955	97.21	0.817	96.883	0.575
2.205	5.444	3.008	99.166	1.499	98.57	0.955	96.47	0.131	96.477	0.383
2.352	5.444	3.008	99.166	1.499	98.57	0.955	96.47	0.131	96.477	0.383
2.499	4.421	2.132	99.166	1.499	98.57	0.955	96.47	0.131	95.799	0.575
2.646	4.421	2.132	99.166	1.499	98.57	0.955	96.47	0.131	95.799	0.575
2.793	4.198	2.046	99.166	1.499	98.57	0.955	96.47	0.131	95.664	0.767
2.94	3.917	1.612	99.166	1.499	97.94	0.387	96.47	0.131	95.664	0.767
3.087	3.917	1.612	99.058	1.561	97.94	0.387	96.47	0.131	95.664	0.767
3.234	3.19	1.204	99.058	1.561	97.94	0.387	96.47	0.131	95.393	1.15
3.381	3.19	1.204	99.058	1.561	97.94	0.387	95.12	0.716	95.393	1.15
3.528	2.909	0.888	98.882	1.948	97.94	0.387	95.12	0.716	95.393	1.15
3.675	2.67	0.665	98.617	2.555	97.94	0.387	95.12	0.716	95.257	1.341
3.822	2.67	0.665	98.617	2.555	97.94	0.387	95.12	0.716	95.122	1.15
3.969	2.67	0.665	98.529	2.761	97.94	0.387	95.12	0.716	94.715	1.725
4.116	2.67	0.665	98.529	2.761	97.623	1.858	95.12	0.716	94.715	1.725
4.263	2.67	0.665	98.529	2.761	97.623	1.186	95.12	0.716	94.58	1.916
4.41	2.67	0.665	98.421	2.796	97.623	1.186	94.77	0.305	94.58	1.916
4.557	2.432	0.742	98.421	2.796	97.623	1.186	94.77	0.305	94.58	1.916
4.704	2.432	0.742	98.421	2.796	97.222	1.186	94.77	0.305	94.58	1.916
4.851	2.432	0.742	98.421	2.796	97.222	1.186	94.77	0.305	94.58	1.916
4.998	2.432	0.742	98.421	2.796	97.222	1.186	94.77	0.305	94.444	1.725
5.145	2.432	0.742	98.421	2.796	97.222	1.186	94.77	0.305	94.444	1.725
5.292	2.432	0.742	98.421	2.796	97.222	1.186	94.77	0.305	94.444	1.725
5.439	2.432	0.742	98.421	2.796	97.222	1.186	94.77	0.305	93.631	2.491
5.586	2.432	0.742	98.421	2.796	97.222	1.186	94.77	0.305	93.36	2.491
5.733	2.432	0.742	98.421	2.796	96.822	1.186	94.77	0.305	92.954	2.683
5.88	2.432	0.742	98.421	2.796	96.822	1.186	94.77	0.305	92.818	2.874
6.027	2.432	0.742	98.421	2.796	96.822	1.186	93.44	0.644	92.547	3.258
6.174	2.432	0.742	98.421	2.796	96.377	1.309	93.44	0.644	92.276	2.874
6.321	2.432	0.742	98.421	2.796	96.377	1.309	93.44	0.644	91.87	3.066
6.468	2.152	0.404	98.421	2.796	96.377	1.309	93.44	0.644	91.87	3.066
6.615	2.152	0.404	98.421	2.796	96.377	1.309	93.44	0.644	91.87	3.066
6.762	2.152	0.404	98.333	2.998	96.377	1.309	93.44	0.644	90.244	3.449
6.909	2.152	0.404	98.333	2.998	96.377	1.309	93.44	0.644	90.108	3.258
7.056	2.152	0.404	98.333	2.998	96.377	1.309	93.44	0.644	89.837	3.258
7.203	2.152	0.404	98.333	2.998	96.377	1.309	93.44	0.644	89.431	3.066
7.35	2.152	0.404	98.333	2.998	95.977	1.941	93.44	0.644	89.431	3.066
7.497	2.152	0.404	98.333	2.998	95.977	1.941	93.44	0.644	89.431	3.066
7.644	2.152	0.404	98.333	2.998	95.977	1.941	93.44	0.644	89.431	3.066
7.791	2.152	0.404	98.333	2.998	95.977	1.941	93.44	0.644	89.295	2.874
7.938	2.152	0.404	98.333	2.998	95.977	1.941	93.44	0.644	89.16	2.683
8.085	2.152	0.404	98.333	2.998	95.977	1.941	93.44	0.644	89.024	2.491
8.232	2.152	0.404	98.244	3.201	95.977	1.941	93.44	0.644	89.024	2.491
8.379	2.152	0.404	98.244	3.201	95.323	2.183	93.44	0.644	89.024	2.491
8.526	2.152	0.404	98.333	2.441	95.323	2.183	93.44	0.644	89.024	2.491
8.673	2.152	0.404	98.333	2.441	95.323	2.183	93.44	0.644	89.024	2.491
8.82	2.152	0.404	98.333	2.441	95.323	2.183	93.44	0.644	89.024	2.491
8.967	2.152	0.404	98.333	2.441	94.752	2.215	93.44	0.644	89.024	2.491
9.114	2.152	0.404	98.333	2.124	94.752	2.215	93.44	0.644	89.024	2.491
9.261	2.152	0.404	98.333	2.124	94.752	2.215	93.44	0.644	88.889	2.3
9.408	2.152	0.404	98.333	2.215	94.752	2.215	93.44	0.644	88.618	2.683
9.555	2.152	0.404	98.333	2.215	94.752	2.215	93.44	0.644	88.618	2.683
9.702	2.152	0.404	98.333	2.215	94.752	2.215	93.44	0.644	88.347	2.3
9.849	2.152	0.404	98.333	2.215	94.752	2.215	93.44	0.644	88.347	2.3
9.996	2.152	0.404	98.244	2.215	94.752	2.215	93.44	0.644	88.076	2.683
	Number of independent experiments = 3
	Number of vesicle measured: ~200 vesicles per condition

## Sheet: Figure 5 - figure supplements
Figure 5 - figure supplement 1											Figure 5 - figure supplement 2A					Figure 5 - figure supplement 2B
Time (s)	Survival Percentages
	No Syt1		Syt1WT		Syt1Q		Syt1F349A
	Average	SD	Average	SD	Average	SD	Average	SD				Number of docked vesicles					Number of docked vesicles
0	100	0	100	0	100	0	100	0				Average	SD				Average	SD
0.147	100	0	100	0	100	0	100	0			Before buffer wash	100	0			Before CDT wash	100	0
0.294	98.5672	3.20392	100	0	99.578	0.244	99.7965	2.40887			After buffer wash	6.2	1.1			After CDT wash	86.3	1.5
0.441	91.3859	5.97302	99.5013	0.51628	99.1169	0.37662	98.4554	3.42922								1mM Ca2+	79.5	1.8
0.588	80.5241	7.82987	98.9544	0.88309	98.189	0.66058	97.3068	3.29575			Number of independent experiments = 3
0.735	66.4641	7.16224	97.3619	2.22531	95.5678	0.96939	94.5977	2.64313			Number of vesicle measured: ~100					Number of independent experiments = 3
0.882	54.8022	7.81462	96.4903	1.46976	90.0663	0.92062	91.5977	1.894								Number of vesicle measured: ~100
1.029	42.5888	8.80355	94.965	1.01464	86.9862	2.74207	90.5977	2.06673
1.176	34.0852	8.7845	92.941	1.41908	84.2941	2.30042	86.6569	2.28348
1.323	27.6015	7.26606	91.3003	2.28758	80.9595	1.88027	82.1468	2.85202
1.47	19.5454	3.95203	89.9153	1.13081	72.9541	3.48063	79.063	2.87863
1.617	15.517	3.44463	88.1385	0.4419	66.252	3.10057	76.4016	3.5267
1.764	12.2657	3.88342	85.4419	1.23174	60.8295	3.67392	74.1588	4.22758
1.911	10.6244	5.12996	83.5101	1.94237	56.6646	4.39564	70.3309	4.92667
2.058	9.33971	5.13497	81.2596	2.80798	52.7373	4.06907	64.2477	5.11141
2.205	7.84258	4.57271	77.7982	2.4628	49.0291	3.26683	61.2392	5.54213
2.352	7.5522	4.48548	74.9276	3.38162	46.523	5.5363	58.1691	5.75819
2.499	7.08638	4.33305	72.3756	2.554	44.2034	6.72885	56.4	5.92551
2.646	6.67838	4.13159	71.2818	3.06563	41.0559	5.8532	54.5902	6.04585
2.793	6.3275	4.07659	68.4301	2.89743	39.6715	4.26683	51.8329	6.12107
2.94	5.75864	3.68299	66.5318	1.63562	36.2251	5.36295	50.4673	6.15313
3.087	5.75864	3.68299	64.1934	2.32443	35.1185	4.28852	46.8546	6.14401
3.234	5.5832	3.68115	60.6398	3.41719	31.9369	4.53205	45.2862	6.09573
3.381	5.5832	3.68115	58.9992	3.78683	31.471	3.76455	43.7599	6.01034
3.528	5.5832	3.68115	56.5686	3.6882	30.1118	5.92987	39.9164	5.88993
3.675	5.35064	3.51213	55.1501	3.9973	28.8514	5.89693	38.4122	5.73666
3.822	5.35064	3.51213	53.7462	3.98528	27.6823	5.8252	34.1062	4.43815
3.969	4.83622	2.97816	53.0925	3.47325	26.5976	5.77204	32.735	4.1376
4.116	4.83622	2.97816	51.4518	4.43383	24.591	5.51765	31.3936	3.83321
4.263	4.83622	2.97816	49.1281	4.98753	23.6566	5.01765	30.0806	3.53699
4.41	4.83622	2.97816	47.8207	4.209	22.789	4.91765	28.795	3.26533
4.557	4.83622	2.97816	45.9999	3.26976	21.9834	5.05413	26.3113	3.04004
4.704	4.83622	2.97816	45.0465	4.13412	21.2351	4.31902	25.5667	2.88797
4.851	4.83622	2.97816	43.1482	3.44122	20.5398	4.70349	24.8536	2.83699
4.998	4.83622	2.97816	41.1346	4.49889	19.8936	3.20126	23.1707	2.90785
5.145	4.83622	2.97816	40.0011	3.57171	19.293	3.99481	21.1656	3.10636
5.292	4.83622	2.97816	39.2846	3.93413	18.7346	4.21704	20.6386	3.82132
5.439	4.3218	2.5619	38.394	3.91595	18.2154	3.77992	20.1338	3.75809
5.586	4.3218	2.5619	37.3674	3.86766	17.9324	3.62179	19.6503	3.69336
5.733	4.3218	2.5619	35.9006	4.71043	17.8301	3.19006	19.1872	3.62739
5.88	4.3218	2.5619	34.9808	5.47524	17.8648	2.79308	18.3189	3.56039
6.027	4.3218	2.5619	34.0023	5.28597	16.4756	3.61065	17.912	3.49257
6.174	4.3218	2.5619	32.9086	5.26654	16.1133	3.06044	17.5222	3.42411
6.321	4.3218	2.5619	31.3497	4.97488	15.7758	3.33672	17.1489	3.35521
6.468	4.3218	2.5619	30.1344	4.97461	15.4616	3.19184	16.7913	3.28601
6.615	4.3218	2.5619	28.982	3.99195	15.1688	3.15172	16.4487	3.21666
6.762	4.3218	2.5619	28.5755	4.69373	14.896	2.7789	16.1206	3.14731
6.909	4.3218	2.5619	28.1104	4.29196	15.1688	2.50559	15.8062	3.07808
7.056	4.3218	2.5619	27.0501	4.4258	14.896	2.67071	15.5051	3.00908
7.203	4.3218	2.5619	26.3818	4.477	14.4047	3.61586	14.9404	2.94041
7.35	4.3218	2.5619	26.2267	4.40526	14.1837	3.00369	14.6757	2.87218
7.497	4.3218	2.5619	26.2267	4.40526	13.9777	3.01658	14.4221	2.80446
7.644	4.3218	2.5619	25.3069	5.29614	13.7854	2.80326	13.5099	2.73735
7.791	4.3218	2.5619	24.605	5.13581	13.6061	2.99893	13.3053	2.6709
7.938	4.3218	2.5619	24.1063	4.64541	13.4387	2.93444	13.1093	2.60519
8.085	4.3218	2.5619	23.6076	4.16127	13.2825	2.78978	12.9215	2.54026
8.232	4.3218	2.5619	23.6076	4.16127	13.1367	3.30595	12.7415	2.47618
8.379	4.3218	2.5619	23.6076	4.16127	13.0005	2.89716	12.5691	2.41298
8.526	4.3218	2.5619	23.4526	4.08493	12.8734	2.23167	12.2457	2.35071
8.673	4.3218	2.5619	23.0943	4.35949	12.7546	2.90845	12.094	2.28939
8.82	4.3218	2.5619	23.0943	4.35949	12.6436	2.91848	11.9488	2.22907
8.967	3.98281	2.24832	22.0341	4.47684	12.5399	2.9227	11.8095	2.16976
9.114	3.98281	2.24832	21.5354	3.98568	12.443	2.52727	11.6762	2.1115
9.261	3.80737	2.32739	21.3321	4.32787	12.3524	3.32842	11.5484	2.05429
9.408	3.80737	2.32739	21.1771	4.25724	12.2677	2.5045	11.4259	1.99815
9.555	3.80737	2.32739	21.1771	4.25724	12.1885	2.68675	11.3086	1.94309
9.702	3.80737	2.32739	20.8188	4.53494	12.1144	2.13855	11.1961	1.88913
9.849	3.80737	2.32739	20.3055	4.7799	12.0451	2.3684	11.0884	1.83626
9.996	3.80737	2.32739	20.1504	4.757	11.9802	2.75969	10.9852	1.7845
10.143	3.80737	2.32739	19.9472	5.07393	11.9195	2.27252	10.8862	1.73384
10.29	3.80737	2.32739	19.9472	5.07393	11.8627	2.42883	9.97644	1.68428
10.437	3.80737	2.32739	19.4485	4.56366	11.8096	2.59146	9.91955	1.63582
10.584	3.80737	2.32739	18.7612	3.66806	11.7598	2.49249	9.86503	1.58846
10.731	3.80737	2.32739	18.558	4.01187	11.7131	3.61995	9.81277	1.54218
10.878	3.80737	2.32739	18.558	4.01187	11.6695	2.27841	9.76269	1.49699
11.025	3.80737	2.32739	18.558	4.01187	11.6286	2.61557	9.71469	1.45287
11.172	3.80737	2.32739	18.558	4.01187	11.5902	2.21013	9.66868	1.40981
11.319	3.80737	2.32739	18.558	4.01187	11.5543	2.13376	9.62458	1.36781
11.466	3.80737	2.32739	18.558	4.01187	11.5206	2.1335	9.58232	1.32684
11.613	3.80737	2.32739	18.558	4.01187	11.4891	2.13324	9.54181	1.2869
11.76	3.80737	2.32739	18.558	4.01187	11.4595	2.13298	9.50298	1.24797
11.907	3.80737	2.32739	18.4029	3.93656	11.4317	2.13273	9.3631	1.21005
12.054	3.80737	2.32739	18.4029	3.93656	11.4057	2.13247	9.33168	1.1731
12.201	3.80737	2.32739	18.2479	3.87842	11.3813	2.13221	9.30156	1.13712
12.348	3.80737	2.32739	18.0446	4.21205	11.3584	2.13195	9.27269	1.1021
12.495	3.80737	2.32739	17.6863	4.49324	11.337	2.13169	9.24501	1.06801
12.642	3.80737	2.32739	17.6863	4.49324	11.3168	2.13144	9.21848	1.03484
12.789	3.80737	2.32739	17.6863	4.49324	11.2979	2.13118	9.19305	1.00257
12.936	3.80737	2.32739	17.6863	4.49324	11.2801	2.13092	9.16867	0.97119
13.083	3.80737	2.32739	17.6863	4.49324	11.2635	2.13066	9.14529	0.94067
	Number of independent experiments = 3
	Number of vesicle measured: ~200 per condition
